# Supplementary material
Source: PubMed Central journal article supplement (PMC7820623)
Supplement: mmc2.pdf [file mmc2.pdf]

# Missense variants in the N-terminal domain of the A isoform of FHF2/FGF13 cause an X-linked developmental and epileptic encephalopathy

Andrew E. Fry,<sup>1,2,\*</sup> Christopher Marra,<sup>3,4</sup> Anna V. Derrick,<sup>5</sup> William O. Pickrell,<sup>5,6</sup> Adam T. Higgins,<sup>5</sup> Johann te Water Naude,<sup>7</sup> Martin A. McClatchey,<sup>2</sup> Sally J. Davies,<sup>1</sup> Kay A. Metcalfe,<sup>8</sup> Hui Jeen Tan,<sup>9</sup> Rajiv Mohanraj,<sup>10</sup> Shivaram Avula,<sup>11</sup> Denise Williams,<sup>12</sup> Lauren I. Brady,<sup>13</sup> Ronit Mesterman,<sup>13</sup> Mark A. Tarnopolsky,<sup>13</sup> Yuehua Zhang,<sup>14</sup> Ying Yang,<sup>14</sup> Xiaodong Wang,<sup>15</sup> Genomics England Research Consortium,<sup>16</sup> Mark I. Rees,<sup>5,17</sup> Mitchell Goldfarb,<sup>3,4</sup> and Seo-Kyung Chung<sup>5,18,19</sup>

## Summary

Fibroblast growth factor homologous factors (FHF) are intracellular proteins which regulate voltage-gated sodium (Na<sub>v</sub>) channels in the brain and other tissues. FHF dysfunction has been linked to neurological disorders including epilepsy. Here, we describe two sibling pairs and three unrelated males who presented in infancy with intractable focal seizures and severe developmental delay. Whole-exome sequencing identified hemi- and heterozygous variants in the N-terminal domain of the A isoform of FHF2 (FHF2A). The X-linked *FHF2* gene (also known as *FGF13*) has alternative first exons which produce multiple protein isoforms that differ in their N-terminal sequence. The variants were located at highly conserved residues in the FHF2A inactivation particle that competes with the intrinsic fast inactivation mechanism of Na<sub>v</sub> channels. Functional characterization of mutant FHF2A co-expressed with wild-type Na<sub>v</sub>1.6 (SCN8A) revealed that mutant FHF2A proteins lost the ability to induce rapid-onset, long-term blockade of the channel while retaining pro-excitatory properties. These gain-of-function effects are likely to increase neuronal excitability consistent with the epileptic potential of *FHF2* variants. Our findings demonstrate that *FHF2* variants are a cause of infantile-onset developmental and epileptic encephalopathy and underline the critical role of the FHF2A isoform in regulating Na<sub>v</sub> channel function.

Voltage-activated sodium channels (Na<sub>v</sub>) play an essential role in the generation and spread of action potentials in excitable tissues.<sup>1,2</sup> Variants in Na<sub>v</sub> channels and their regulatory partners are a major cause of infantile-onset developmental and epileptic encephalopathies (DEEs).<sup>3,4</sup> DEEs are typically associated with developmental delay or regression, treatment-resistant seizures, and electroencephalographic abnormalities.<sup>5,6</sup> The developmental consequences of DEEs are due to frequent epileptiform activity in combination with the direct effects of the genetic variant.<sup>7,8</sup>

Fibroblast growth factor homologous factors (FHF) are intracellular proteins that bind to the C-terminal domain of Na<sub>v</sub> channels to modulate their function and location.<sup>9–12</sup> FHF were initially identified due to their homology with fibroblast growth factors (FGFs).<sup>13</sup> However, FHF are not secreted by cells and have only limited ability to

activate FGF receptors.<sup>9,14,15</sup> There are four FHF genes in mammals (often referred to by their FGF names): *FHF1* (*FGF12* [MIM: 601513]), *FHF2* (*FGF13* [MIM: 300070]), *FHF3* (*FGF11* [MIM: 601514]), and *FHF4* (*FGF14* [MIM: 601515]).<sup>9</sup> The FHF genes have multiple transcription initiation sites. The alternative first exons produces multiple isoforms with variable N-terminal domains.<sup>16</sup> The isoforms differ in their localization and ability to regulate Na<sub>v</sub> channels.<sup>9</sup> *FHF2*, located at Xq26.3-q27.1, is highly expressed in the developing and adult brain.<sup>9,13</sup> *FHF2* is also expressed in endocrine tissues, ovaries, skeletal muscle, and the myocardium of the developing heart.<sup>17–19</sup> *FHF2* has been implicated in a variety of functions including microtubule stability, axonogenesis, neuronal migration,<sup>20</sup> interneuron development,<sup>21</sup> cardiac conduction,<sup>22</sup> and thermogenesis.<sup>23</sup> Here, we present evidence that variants in *FHF2* cause a DEE.

<sup>1</sup>Institute of Medical Genetics, University Hospital of Wales, Cardiff CF14 4XW, UK; <sup>2</sup>Division of Cancer and Genetics, School of Medicine, Cardiff University, Cardiff CF14 4XN, UK; <sup>3</sup>Department of Biological Sciences, Hunter College of City University, 695 Park Avenue, New York, NY 10065, USA; <sup>4</sup>Program in Biology, Graduate Center of City University, 365 Fifth Avenue, New York, NY 10016, USA; <sup>5</sup>Neurology and Molecular Neuroscience Research, Institute of Life Science, Swansea University Medical School, Swansea University, Swansea SA2 8PP, UK; <sup>6</sup>Neurology department, Morriston Hospital, Swansea Bay University Hospital Health Board, Swansea SA6 6NL, UK; <sup>7</sup>Paediatric Neurology, University Hospital of Wales, Heath Park, Cardiff CF14 4XW, UK; <sup>8</sup>Manchester Centre for Genomic Medicine, Manchester University NHS Foundation Trust and Institute of Human Development, University of Manchester, Manchester M13 9WL, UK; <sup>9</sup>Department of Paediatric Neurology, Royal Manchester Children's Hospital, Oxford Road, Manchester M13 9WL, UK; <sup>10</sup>Department of Neurology, Salford Royal Hospital NHS Foundation Trust, Stott Lane, Salford M6 8HD, UK; <sup>11</sup>Department of Radiology, Alder Hey Children's NHS Foundation Trust, Eaton Road, Liverpool L12 2AP, UK; <sup>12</sup>West Midlands Regional Genetics Service, Clinical Genetics Unit, Birmingham Women's Hospital, Birmingham B15 2TG, UK; <sup>13</sup>Department of Paediatrics, McMaster University, 1200 Main St. W., Hamilton, ON L8N 3Z5, Canada; <sup>14</sup>Department of Pediatrics, Peking University First Hospital, Xicheng District, Beijing 100034, China; <sup>15</sup>Cipher Gene Ltd, Beijing, China; <sup>16</sup>Genomics England, London EC1M 6BQ, UK; <sup>17</sup>Faculty of Medicine and Health, Camperdown, University of Sydney, NSW 2006, Australia; <sup>18</sup>Kids Neuroscience Centre, Kids Research, Children Hospital at Westmead, Sydney, NSW 2145, Australia; <sup>19</sup>Brain and Mind Centre, Faculty of Medicine and Health, University of Sydney, NSW 2050, Australia

\*Correspondence: [fryae@cardiff.ac.uk](mailto:fryae@cardiff.ac.uk)

<https://doi.org/10.1016/j.ajhg.2020.10.017>

© 2020 American Society of Human Genetics.

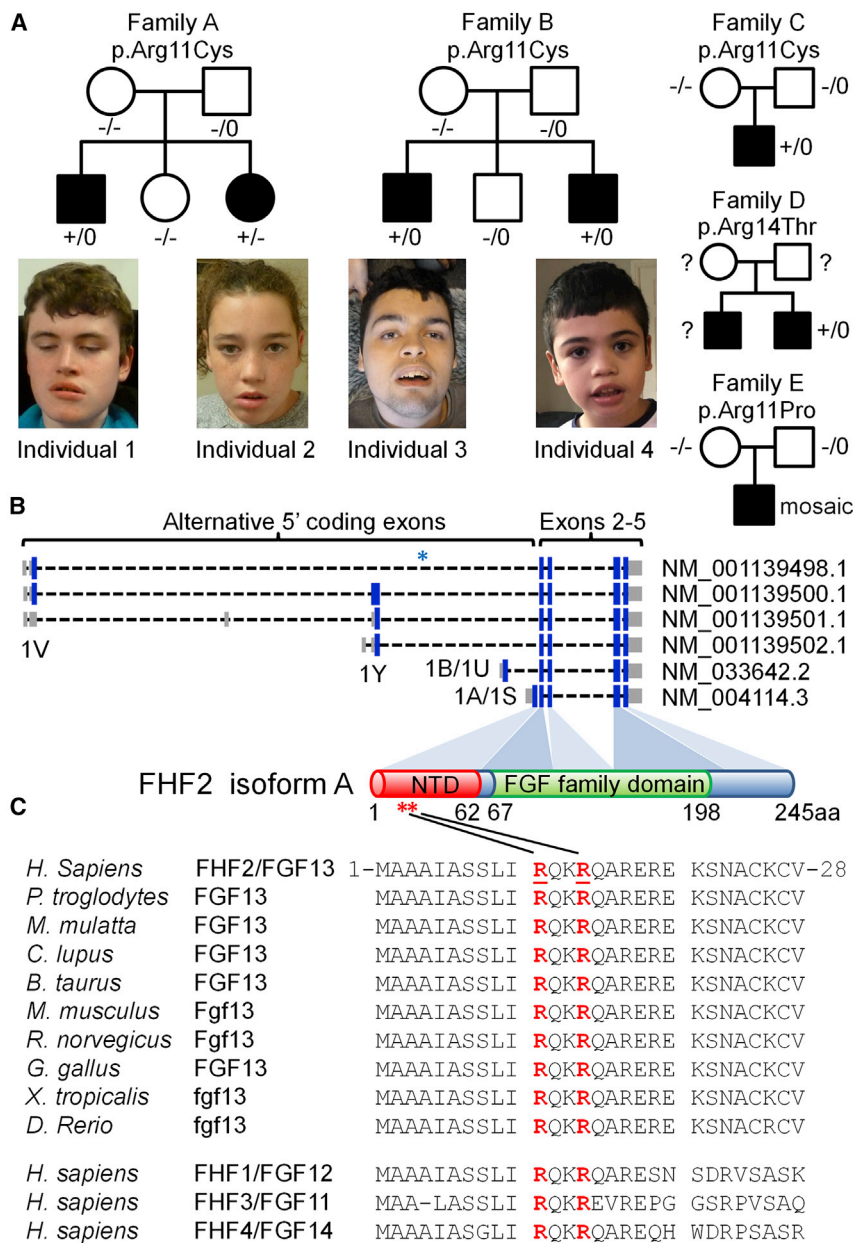

**Figure 1. Family pedigrees and locations of the FHF2A variants**

(A) Pedigrees of families A–E with photographs of the affected individuals from families A and B. Genotypes are heterozygous mutant (+/-), homozygous wild type (-/-), hemizygous mutant (+/0), hemizygous wild type (-/0), or unknown (?).

(B) Exonic models of the *FHF2* transcripts showing the alternative 5' coding exons. The FHF2A protein isoform is derived from the GenBank: NM\_004114.5 transcript which is initiated from an ATG start site in exon 1A (also known as exon 1S). The V, Y, U, and S nomenclature originates from Munoz-Sanjuan et al.<sup>27</sup> The 1A/1S exon encodes the N-terminal domain (NTD) of FHF2A (amino acid residues 1 to 62). The shared C-terminal exons encode the core fibroblast growth factor (FGF) domain (amino acid residues 67 to 198). The blue asterisk indicates the location of the breakpoint of the translocation described by Puranam et al.<sup>28</sup> The red asterisks indicate the location of the DEE-associated missense variants.

(C) The FHF2 (FGF13) substitutions are located at highly conserved residues in the N-terminal domain of the A isoform. Homology alignments for human FHF2 (GenBank: NP\_004105.1, amino acid residues 1–28) and a range of orthologs and paralogs. Orthologs include chimpanzee (GenBank: XP\_001138460.1), rhesus macaque (GenBank: NP\_001252772.1), dog (GenBank: XP\_549294.2), cow (GenBank: NP\_001092362.1), mouse (GenBank: NP\_034330.2), rat (GenBank: XP\_006257654.1), chicken (GenBank: XP\_015133693.1), western clawed frog (GenBank: XP\_012824080.1), and zebrafish (GenBank: XP\_005173268.1). Paralogs include FHF1/FGF12 (GenBank: NP\_066360.1), FHF3/FGF11 (GenBank: NP\_004103.1), and FHF4/FGF14 (GenBank: NP\_004106.1). The positions of the Arg11 and Arg14 residues are underlined and in red.

We identified seven individuals from five unrelated families who presented with severe infantile-onset seizures. Individuals 1 and 2 were a brother and sister from family A (Figure 1A) who had whole-exome sequencing (WES) as part of the Wales Epilepsy Research Network (WERN) family study. Individuals 3 and 4 were brothers from family B who had WES as part of the Deciphering Developmental Disorders (DDD) study.<sup>24</sup> Individual 5 from family C had WES performed by GeneDx. Individuals 1 to 5 shared the same seemingly *de novo* missense variant in *FHF2*, chrX (GRCh38/hg38):g.138710973G>A, GenBank: NM\_004114.5: c.31C>T (p.Arg11Cys). Individual 6 from family D also had WES as part of the DDD study. Individual 6 had a different nearby variant in *FHF2*, chrX (GRCh38/hg38): g.138710963C>G, GenBank: NM\_004114.5: c.41G>C (p.Arg14Thr). Parental testing for

this individual was not possible. Individual 7 from family E had trio whole-genome sequencing (WGS) performed by Cipher Gene. Individual 7 was mosaic (7 variant reads out of 17 total) for a different missense change at the Arg11 residue, chrX (GRCh38/hg38):g.138710972C>G, GenBank: NM\_004114.5: c.32G>C (p.Arg11Pro). The mosaicism was confirmed by WES (14 variant reads out of 26 total) and Sanger sequencing. Identification of individuals 5 and 7 was achieved via GeneMatcher.<sup>25</sup> Maternal mosaicism is likely to explain the sibling recurrence in families A and B. This was not detected by WES or Sanger sequencing. Families A and B and individual 6 also had WGS as part of the 100,000 Genomes Project.<sup>26</sup> WGS confirmed the variants in the affected individuals. The p.Arg11Cys variant was not detected in the mother of family A but the mother of family B had 2 variant reads out of

**Table 1. Clinical and molecular findings in the individuals with N-terminal FHF2A variants**

| Individual       | 1 (family A)                                                       | 2 (family A)                                                                       | 3 (family B)                                                     | 4 (family B)                                                                                  | 5 (family C)                                                 | 6 (family D)            | 7 (family E)                                                      |
|------------------|--------------------------------------------------------------------|------------------------------------------------------------------------------------|------------------------------------------------------------------|-----------------------------------------------------------------------------------------------|--------------------------------------------------------------|-------------------------|-------------------------------------------------------------------|
| Age              | 15 y                                                               | 13 y                                                                               | 19 y                                                             | 12 y                                                                                          | 2 y 3 m                                                      | 5 y                     | 5y 8 m                                                            |
| Sex              | male                                                               | female                                                                             | male                                                             | male                                                                                          | male                                                         | male                    | male                                                              |
| Variant          | c.31C>T<br>(p.Arg11Cys)                                            | c.31C>T<br>(p.Arg11Cys)                                                            | c.31C>T<br>(p.Arg11Cys)                                          | c.31C>T<br>(p.Arg11Cys)                                                                       | c.31C>T<br>(p.Arg11Cys)                                      | c.41G>C<br>(p.Arg14Thr) | c.32G>C<br>(p.Arg11Pro)                                           |
| Inheritance      | maternal gonadal mosaicism <sup>a</sup>                            | maternal gonadal mosaicism <sup>a</sup>                                            | maternal somatic mosaicism                                       | maternal somatic mosaicism                                                                    | <i>de novo</i>                                               | unknown                 | mosaic                                                            |
| OFC              | −1.4 SD at 13 y 10 m                                               | +0.8 SD at 6 y 9 m                                                                 | −0.2 SD at 19 y                                                  | −1.4 SD at 12 y 5 m                                                                           | −1.1 SD at 22 m                                              | −2.5 SD at 5 y          | −2.6 SD at 3 y 2 m                                                |
| ID/DD            | profound                                                           | severe                                                                             | severe                                                           | severe                                                                                        | profound                                                     | severe                  | severe                                                            |
| Initial concerns | 11 d, apneas, repetitive swallowing, head deviation, eye twitching | 11 d, apneas, lip smacking, repetitive swallowing, eye deviation, facial twitching | 4 w, apneas, stiffness                                           | 6 m, head and eye deviation, twitching                                                        | 5 d, head and eye deviation, blinking, repetitive swallowing | 1 d, apnea, cyanosis    | 6 m, focal sz                                                     |
| Epilepsy         | focal sz at 2 m. generalized sz from 7 m                           | focal sz from 11 m. rarely generalized                                             | focal sz at 2 m. flexor spasms from 6 m                          | focal sz at 6 m. generalized sz from 2.5 y, episodes of NCSE, tonic sz and vomiting currently | focal discognitive seizures                                  | yes                     | focal sz at 6 m. also spasms, myoclonic sz, GTCS                  |
| EEG              | multiple epileptogenic temporal foci, EIMFS considered             | ictal EEG at 6 y 8 m, left fronto-temporal focus                                   | hyparrhythmia at 6 m. later EEG suggestive of LGS                | hyparrhythmia at 2.5 y, EEG at 11 y suggestive of LGS                                         | multiple epileptogenic temporal foci, suggestive of LGS      | n/k                     | atypical hyparrhythmia and intermittent burst suppression at 23 m |
| Neurology        | hypotonia, no hyperreflexia                                        | normal tone and reflexes                                                           | low axial tone, mild limb hypertonia, no hyperreflexia or tremor | broad-based, unsteady gait, mildly increased limb tone                                        | hypotonia, periodic abnormal posturing                       | n/k                     | limb hypertonia, positive Babinski sign and ankle clonus          |
| Other features   | constipation, abdominal pain, subtotal colectomy and ileostomy     | left anterior temporal lobectomy and partial amygdalo-hippocampectomy              | severe scoliosis                                                 | antenatal renal pelvic dilatation, recurrent UTI, nephrectomy                                 | hypothyroidism                                               | atrial septal defect    | regression at 14 m                                                |

Variants based on transcript GenBank: NM\_004114.5. Age in y(ears), m(onths), w(eeks), or d(ays); AED, antiepileptic drugs; ASD, autism spectrum disorder; EEG, electroencephalogram; EIMFS, epilepsy of infancy with migrating focal seizures; GTCS, generalized tonic-clonic seizures; ID/DD, intellectual disability or developmental delay; LGS, Lennox-Gastaut syndrome; NCSE, nonconvulsive status epilepticus; n/k, not known; SD, standard deviations; sz, seizures; UTI, urinary tract infection.

<sup>a</sup>Maternal gonadal mosaicism is presumed in family A.

40 total, consistent with low-level mosaicism. Individuals who had evaluation or analysis beyond routine clinical care were part of research studies approved by either the Research Ethics Committee for Wales (09/MRE09/51) or the Cambridge South Research Ethics Committee (10/H0305/83 and 14/EE/1112). The parents and carers of the individuals gave consent for their publication in this report.

The clinical features of the seven individuals are summarized in Table 1. Detailed case reports for the individuals are provided in the supplemental note. Shared features included global developmental delay and severe or profound intellectual disability. Individuals 2–4 and 6 were diagnosed with autism spectrum disorder. All seven individuals had treatment-resistant epilepsy. Five presented in the neonatal period with episodes of apnea and cyanosis. The predominant epilepsy phenotype was focal

seizures often with secondary generalization. A range of other seizure types were reported including epileptic spasms, tonic seizures, gelastic seizures, absence seizures, drop attacks, and generalized tonic-clonic seizures. The focal seizures were associated with motor features (eye twitching or head deviation), apneas, and orolimentary automatisms (chewing or repeated swallowing). Autonomic features included drooling, ictal vomiting, and skin flushing. EEGs found evidence of temporal lobe foci in some. Seizures were resistant to a wide range of antiepileptic drugs (AED). Two individuals had vagus nerve stimulators implanted. Individual 2 underwent left anterior temporal lobectomy and partial amygdalohippocampectomy at 7 years of age. She was seizure free for 2 years; however, the focal seizures resumed and at last review (13 years of age) she was having fortnightly clusters despite three AEDs. Constipation was common in the group and

one person (individual 1) had subtotal colectomy and ileostomy due to chronic constipation and recurrent severe abdominal pain. Physical examination of the individuals revealed normal or reduced muscle tone. There was no spasticity or hyperreflexia. Subtle dysmorphic features were noted but these were variable and may reflect the effects of AEDs and facial hypotonia. Photographs of individuals 1–4 are shown in [Figure 1A](#). Brain MRI scans in infancy were normal. Brain MRI scans of individual 2 at 6 years of age and individual 7 at 3 years of age found evidence of cerebral atrophy. Individual 4 had a 3T MRI brain scan at 13 years of age which showed symmetrical T2 hyperintensity of the hippocampal body and head with loss of definition of the internal architecture.

The three variants p.Arg11Cys, p.Arg11Pro, and p.Arg14Thr identified in the affected individuals are not present in population databases such as gnomAD.<sup>29</sup> The variants were predicted to be deleterious by a range of *in silico* prediction programs ([Table S1](#)).<sup>30</sup> The variants are located in exon 1A of *FHF2*. This exon encodes the N-terminal domain specific to the A isoform of the FHF2 protein (FHF2A) ([Figure 1B](#)). The 1A exon is highly conserved across species and across all four FHF genes ([Figure 1C](#)). The Arg11 and Arg14 residues are completely conserved in all sequences. Overall, *FHF2* is moderately intolerant to variation (gnomAD missense z-scores range from 1.59 to 2.11 for the different isoforms). However, the N-terminal of the A isoform (ENST00000315930.6) is particularly constrained with no gnomAD missense variants in the first 21 residues.<sup>29</sup> In contrast, there are 5 gnomAD synonymous variants in the same region and 7–10 missense variants in the first 21 residues of the other FHF2 isoforms.

The *FHF2* exon 1A missense variants are at residues known to contribute to long-term Na<sub>v</sub> channel block.<sup>31</sup> Na<sub>v</sub> channels cycle between closed (or resting), open, and inactivated states ([Figure 2A](#)).<sup>32</sup> Membrane depolarization from resting potential to the voltage threshold for Na<sub>v</sub> channel activation triggers the shift from a closed to an open state. The channel is open for around a millisecond before inactivation occurs. The majority of channels are inactivated by a mechanism intrinsic to the Na<sub>v</sub> channel but around one third are inactivated by an “inactivation particle” contained by the N-terminal domain of A-type FHF proteins.<sup>33</sup> Channels can recover (or reprime) to a closed state upon hyperpolarization of the membrane. Recovery from the intrinsic Na<sub>v</sub> inactivation mechanism is complete within 10 ms while recovery from FHF-mediated inactivation takes hundreds of milliseconds. Channels may also proceed directly from a closed to an inactivated state (“steady-state” inactivation). A-type FHF isoforms have a mixture of inhibitory and pro-excitatory effects on the inactivation mechanisms of Na<sub>v</sub> channels. Repeated cycles of channel opening promote accumulation of channels in FHF-mediated long-term block. This contributes to a run-down in Na<sub>v</sub> channel availability immediately following a cluster of action potentials.<sup>33,34</sup> Through this inhibitory

mechanism, A-type FHF isoforms can induce spike-frequency adaptation, also termed accommodation.<sup>31</sup> One potential function of accommodation is to prevent persistent excitation of neural networks and seizures.<sup>35,36</sup> In contrast, A-type FHF isoforms also induce a depolarizing shift in the voltage dependence of Na<sub>v</sub> channels for steady-state inactivation.<sup>33,34,37,38</sup> This is pro-excitatory because it limits steady-state inactivation of channels at resting potential. Another pro-excitatory effect of A-type FHF isoforms is to slow the intrinsic fast inactivation of channels during membrane depolarization and action potential initiation.<sup>10,34</sup>

To assess the functional effects of FHF2A p.Arg11Cys and p.Arg14Thr on neuronal sodium channel gating, we measured sodium currents during voltage clamp protocols in FHF-negative Neuro2A cells co-transfected with constructs expressing Na<sub>v</sub>1.6 (SCN8A) and either wild-type FHF2A (FHF2A<sub>WT</sub>) or a mutated version (FHF2A<sub>R11C</sub> or FHF2A<sub>R14T</sub>). Detailed descriptions of the plasmids, mutagenesis, transfection of Neuro2A cells and measurement of sodium currents are provided in the [supplemental material and methods](#). All procedures parallel those we have described previously.<sup>31,33</sup> Patched cells were depolarized to 0 mV for four 16 ms intervals separated by 40 ms recovery periods at –90 mV to allow for sodium channel recovery from intrinsic fast inactivation ([Figure 2B](#)). In cells expressing FHF2A<sub>WT</sub>, transient Na<sub>v</sub>1.6 sodium current amplitude diminishes with each depolarization cycle ([Figures 2C](#) and [2F](#)), reflecting accumulating long-term inactivation of Na<sub>v</sub>1.6. By contrast, the extent of long-term channel inactivation is greatly reduced in cells expressing FHF2A<sub>R11C</sub> ([Figures 2D](#) and [2F](#)), while the sodium currents during four depolarization cycles in cells expressing FHF2A<sub>R14T</sub> are indistinguishable from those in cells without FHF2 ([Figures 2E](#) and [2F](#)), demonstrating that FHF2A<sub>R14T</sub> is incapable of promoting Na<sub>v</sub>1.6 long-term inactivation.

In a second experiment to assess the effects of the FHF2A variants on long-term channel inactivation, cells were subjected to multiple rapid depolarization cycles followed by a –90 mV recovery period of varying duration (20 ms to 1 s) before a subsequent test depolarization. In cells expressing FHF2A<sub>WT</sub>, near-full recovery of Na<sub>v</sub>1.6 from long-term inactivation required 1 s, while in cells expressing FHF2A<sub>R11C</sub> channels fully recovered by 200 ms ([Figure 2G](#)). Cells expressing FHF2A<sub>R14T</sub> again show no evidence of Na<sub>v</sub>1.6 long-term inactivation, as channels fully recover as quickly as in cells lacking FHF ([Figure 2G](#)).

Although impaired in their ability to promote Na<sub>v</sub>1.6 long-term inactivation, FHF2A<sub>R11C</sub> and FHF2A<sub>R14T</sub> are expressed at comparable levels to FHF2A<sub>WT</sub> in transfected cells and the mutant isoforms associate with Na<sub>v</sub>1.6 as effectively as does FHF2A<sub>WT</sub>, as demonstrated by co-immunoprecipitation ([Figure S1](#)). This indicates the variants do not disrupt binding of FHF2 to the C-terminal cytoplasmic tail of Na<sub>v</sub> channels. This binding is mediated by the conserved β-trefoil core domain shared by all FHF



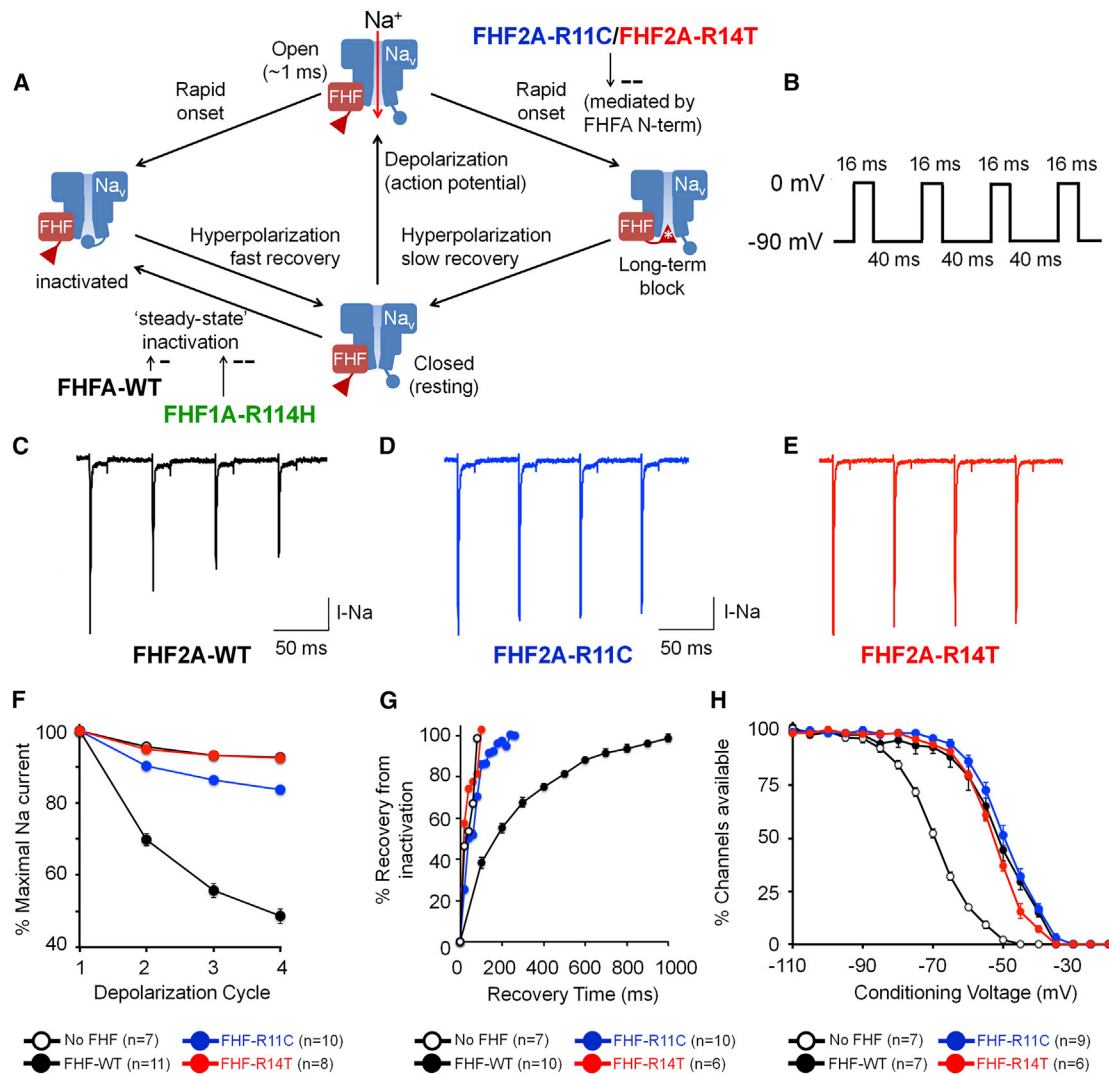

**Figure 2. Functional characterization of the variants in the FHF2A N-terminal domain**

(A) Scheme of voltage-dependent sodium ( $\text{Na}_v$ ) channel state transitions as modulated by A-type fibroblast growth factor homologous factors (FHF), as described previously.<sup>31,33</sup> Strong rapid depolarization results in transient opening of channels and sodium influx (vertical red arrow). Within milliseconds, channels intrinsically inactivate (leftward descending arrow). When channels are physically associated with A-type FHF, the N terminus (red triangle) competes with the intrinsic  $\text{Na}_v$  mechanism (blue circle) to rapidly induce long-term inactivation (rightward descending arrow). Recovery to the closed state upon repolarization requires hundreds of milliseconds. Long-term inactivation of channels is impaired in presence of the FHF2A<sub>R11C</sub> or FHF2A<sub>R14T</sub> (white asterisk). A-type FHF<sub>s</sub> raise the voltage dependence of steady-state inactivation, preserving more channels in the closed (resting) state. The pro-excitatory DEE-associated FHF1A<sub>R114H</sub> mutant protein further raises the voltage dependence of steady-state inactivation.<sup>4</sup>

(B) Voltage-clamp protocol for accumulating long-term inactivation used in (C)–(E). The 40 ms intervals at  $-90$  mV allow for full recovery from intrinsic fast inactivation, but only partial recovery from long-term inactivation, which has a far slower recovery rate.

(C–E) Representative sodium current traces in Neuro2A cells expressing  $\text{Na}_v1.6$  together with either (C) FHF2A<sub>WT</sub>, (D) FHF2A<sub>R11C</sub>, or (E) FHF2A<sub>R14T</sub>. The variants impair channel long-term inactivation.

(F) Analysis of long-term inactivation induced by wild-type and mutant FHF2A proteins. *n* represents the number of transfected cells recorded for a given experimental protocol. Data points represent the mean  $\pm$  standard error (error bars) from the *n* recorded cells. The impaired long-term inactivation of FHF2A<sub>R11C</sub> and FHF2A<sub>R14T</sub> in comparison to FHF2A<sub>WT</sub> upon depolarizations 2,3,4 is highly significant ( $p < 10^{-7}$ ).

(G) Analysis of  $\text{Na}_v1.6$  recovery from long-term inactivation at  $-90$  mV.  $\text{Na}_v1.6$  recovers faster in cells expressing FHF2A<sub>R11C</sub> or FHF2A<sub>R14T</sub> compared to cells expressing FHF2A<sub>WT</sub>.

(H) FHF2A<sub>R11C</sub> and FHF2A<sub>R14T</sub> retain the ability to induce 17–19 mV depolarizing shifts in the voltage dependence of  $\text{Na}_v1.6$  steady-state inactivation.

isoforms.<sup>16,39</sup> In contrast, residues 2–21 of A-type FHF<sub>s</sub> contain the inactivation particle that competes with the intrinsic fast inactivation mechanism of  $\text{Na}_v$  channels following membrane depolarization.<sup>33</sup> The reduced ability

of mutant FHF2A to promote  $\text{Na}_v1.6$  long-term inactivation indicates the N-terminal variants impair function of this inactivation particle. Mutagenesis of FHF2A to replace Arg11 or Arg14 with glutamine prevented binding of an

antibody specific to the N-terminal of A-type FHF1s.<sup>31</sup> This suggests that both residues are prominent surface features. Both FHF2A<sub>R11Q</sub> and FHF2A<sub>R14Q</sub> showed impaired accumulation of long-term inactivation and hastened recovery of Na<sub>v</sub> channels while having little effect on the ability of FHF2A to modulate steady-state inactivation. These findings are consistent with our results for the two DEE-associated variants which suggest the effects are due to loss of the cationic arginine side chains rather than specific effects of the substituted side chains.

Consequently, we tested the ability of mutant FHF2A proteins to modulate the voltage dependence of Na<sub>v</sub>1.6 steady-state inactivation. As shown in Figure 2H, FHF2A<sub>R11C</sub> and FHF2A<sub>R14T</sub> raised the V<sub>1/2</sub> for channel steady-state inactivation by 17 mV and 19 mV, respectively, which was statistically indistinguishable from the 18 mV V<sub>1/2</sub> elevation of Na<sub>v</sub>1.6 inactivation mediated by FHF2A<sub>WT</sub>. Therefore, the DEE-associated variants preserve this pro-excitatory property of FHF2A while suppressing the sodium channel long-term inactivation mechanism by which FHF2A can attenuate excitation.

The *FHF2* exon 1A missense variants join a growing number of isoform-specific variants that have been reported in epileptic encephalopathies.<sup>40–42</sup> Around 30% of neonatal epilepsy genes have brain-expressed alternative coding regions, suggesting that isoform-specific variants are relatively common.<sup>43</sup> However, variants in alternative transcripts are prone to being missed or misinterpreted due to problems with panel designs and genome annotation.<sup>44</sup> This may have contributed to FHF2-DEE not being recognized until now.

Deleterious variation in FHF genes has previously been associated with neurological disorders. In 2015, a balanced reciprocal translocation, t(X; 14) (q27; q21), disrupting *FHF2* was reported segregating in a family (two brothers and their mother) with genetic epilepsy and febrile seizures plus (GEFS+ [MIM: 604233]).<sup>28</sup> One of the brothers and other members of their extended family had cognitive impairment. The translocation breakpoint occurred after two of the alternative first coding exons of *FHF2* (exons 1V and 1Y, using the notation from Munoz-Sanjuan et al.<sup>27</sup>) but before the first coding exons of the two main isoforms, exon 1A (also known as 1S, employed by FHF2A) and exon 1B (also known as 1U, used by FHF2B). The predicted consequence was to disrupt the minor isoforms of *FHF2* which use the more 5' exons. There was a subsequent report of a *de novo* missense variant in *FHF2* (GenBank: NM\_004114.5: c.638C>T [p.Thr213Met]) in one individual with mild febrile seizures, normal development, and facial edema.<sup>45</sup> However, the significance of this variant was uncertain.

Gain-of-function variants in *FHF1* (*FGF12*) have recently been identified in individuals with DEE (MIM: 617166).<sup>4,46,47</sup> There are strong similarities between FHF1- and FHF2-DEE. FHF1-DEE (familial early-onset epileptic encephalopathy with progressive cerebral atrophy) presents with seizures in early infancy and severe

developmental delay. The epileptic phenotypes of FHF1 and FHF2 disease are similar. FHF1-DEE is typically associated with focal epilepsy or a combined generalized and focal epilepsy.<sup>48</sup> Tonic seizures with autonomic signs are common in both FHF1- and FHF2-DEE. Other seizure types reported in both disorders include generalized tonic-clonic seizures, epileptic spasms, and absence and myoclonic seizures. The epilepsy in FHF1-DEE is often intractable but responsiveness to phenytoin (a sodium channel blocker) has been noted.<sup>47–49</sup> Individuals 3 and 4 in our series gained at least transient benefit from phenytoin. The other subjects have either not been given phenytoin or their response is unknown.

Individuals with FHF1-DEE have been noted to have progressive cerebellar atrophy, potentially as a result of excitotoxic damage.<sup>4</sup> Loss-of-function variants in *FHF4* (*FGF14*) have also been associated with cerebellar dysfunction (and occasionally cerebellar atrophy) as the cause of spinocerebellar ataxia type 27 (MIM: 609307).<sup>50,51</sup> In contrast, structural and functional abnormalities of the cerebellum were not observed in FHF2-DEE. Different gene expression patterns may explain this difference as FHF1 and FHF4 are both highly expressed in the cerebellum while FHF2 is not.<sup>9,18</sup> An additional difference between FHF1- and FHF2-DEE is that the recurrent FHF1-DEE variant is present in both the A (GenBank: NM\_021032.4: c.341G>A [p.Arg114His]) and B (GenBank: NM\_004113.6: c.155G>A [p.Arg52His]) isoforms. This residue is located in the B4-B5 loop of the core FHF domain that contributes to the highly conserved structural interface between FHF proteins and the cytoplasmic tails of Na<sub>v</sub> channels.<sup>4</sup> Substitution of FHF1A Arg114/FHF1B Arg52 to other amino acids increased the depolarizing shift in the voltage dependence of steady-state inactivation of Na<sub>v</sub>1.6 (Figure 2A). The shift of this voltage dependence (which increases the availability of resting channel) was greatest for the mutant form of the A isoform. In contrast, FHF2-DEE variants do not alter steady-state inactivation; instead, they disrupt the ability of the N-terminal inactivation particle to cause long-term inhibition of Na<sub>v</sub> channels.

We recognize the need for caution in interpreting the significance of the variant in female individual 2 when *FHF2* is X linked and the other individuals are male. However, individual 2's epilepsy phenotype was strikingly similar to her brother's and no other cause for her DEE was identified. X chromosome inactivation assays found no significant skewing in her blood (65:35 at *AR* [MIM: 313700] and 55:45 at *ZNF261* [MIM: 300061]), suggesting the variant allele is active in a moderate proportion of her somatic tissues (although this may not reflect the inactivation pattern in her brain). Consistent with being heterozygous, individual 2 had a milder phenotype than her hemizygous brother and the other males. A difference in severity was also present in the GEFS+ family with the balanced translocation described by Puranam et al.<sup>28</sup> The mother with the translocation had febrile seizures in infancy but was neurologically normal and seizure free in

adulthood. In contrast, her sons had febrile seizures and temporal lobe epilepsy and one had cognitive impairment. A sex difference is recapitulated by the *Fhf2* knockout animal model. Female heterozygous knockout mice are viable but have increased susceptibility to hyperthermia-induced seizures.<sup>28</sup> The brains of female heterozygous knockout mice demonstrate mosaic expression of wild-type and null *Fhf2* alleles (C.M. and M.G., unpublished data). There is evidence for reduced embryonic survival of male mice, although this may be dependent on strain background.<sup>20,22,28</sup> Surviving male knockout mice experience progressive conduction failure in response to higher body temperatures. No cardiac conduction abnormalities were observed in our series. However, loss-of-function partial or whole gene deletions are likely to have different effects from gain-of-function missense variants.

*FHF2* was historically considered a candidate gene for Börjeson-Forssman-Lehmann syndrome (BFLS [MIM: 301900]), an X-linked intellectual disability syndrome associated with dysmorphism, epilepsy, obesity, and hypogonadism.<sup>20,52</sup> An individual with BFLS-like features (and neonatal-onset seizures) had a maternally inherited Xq26q28 duplication.<sup>52</sup> The breakpoint was mapped to a ~400 kb interval in Xq26.3, a region which contains *FHF2*. BFLS was subsequently mapped to variants in *PHF6* (MIM: 300414), a gene nearby in Xq26.2. The clinical significance of copy-number variation involving *FHF2* remains uncertain. However, metrics of dosage sensitivity (haploinsufficiency score 3.17, top 5<sup>th</sup> percentile)<sup>53</sup> and mutational constraint (probability of being loss-of-function intolerant 0.97),<sup>29</sup> and evidence from human and animal studies<sup>20,22,28</sup> suggests they are likely to have clinically significant effects. Notably, duplications of *FHF1* have been reported in individuals with DEE.<sup>49,54</sup>

A-type FHF, including FHF2A, and slow-activating/deactivating voltage-gated potassium channels (Kv7.2 and Kv7.3) both contribute to attenuation of excitatory drive by either run-down of the sodium conductance or build-up of the potassium conductance, respectively.<sup>55,56</sup> Consequently, both of these processes contribute to spike frequency adaptation (accommodation), as documented in CA1 hippocampal pyramidal neurons.<sup>31,57,58</sup> Variants in the genes encoding Kv7.2 or Kv7.3 (*KCNQ2* [MIM: 602235] and *KCNQ3* [MIM: 602232]) cause early-onset epilepsy phenotypes including DEEs.<sup>55,56</sup> Our new findings regarding FHF2A thereby suggest that disturbed spike frequency adaptation is an important mechanism in epileptogenesis.

In conclusion, we have identified hemi- and heterozygous missense variants in the N-terminal of the A isoform of FHF2 as a cause of infantile-onset DEE. Our functional results demonstrate that the variants lead to gain of function because they disrupt the ability of FHF2A to cause long-term inactivation of Na<sub>v</sub> channels while preserving pro-excitatory properties of FHF2A. Our study provides evidence for the critical role of the FHF2A isoform in regulating Na<sub>v</sub> channel function and neuronal excitability.

## Data and Code Availability

DDD exome data are available through the European Genome-phenome Archive (Study ID EGAS00001000775). Researchers must complete a Data Access Form detailing their research aims and be approved by the DDD data access committee. Whole-genome sequence data generated by the 100,000 Genomes Project is available to researchers at institutions who join the Genomics England Clinical Interpretation Partnership. All other exome data are available from the authors upon reasonable request and with the permission of the families.

## Supplemental Data

Supplemental Data can be found online at <https://doi.org/10.1016/j.ajhg.2020.10.017>.

## Acknowledgments

We thank the individuals and their families for participating in this study. We thank Dr. David Bunyan of the Wessex Regional Genetics Laboratory for performing the X-chromosome inactivation analysis. A.E.F., M.I.R., and S.-K.C. were supported by WERN, BRAIN Unit, and Wales Gene Park. WERN was funded by The National Institute of Social Care and Health Research. BRAIN Unit and Wales Gene Park are funded by Health and Care Research Wales. C.M. and M.G. were funded in part by grant R01HL142498 from the National Heart Lung and Blood Institute at the National Institutes of Health. The DDD study presents independent research commissioned by the Health Innovation Challenge Fund (grant number HICF-1009-003). This study makes use of DECIPHER, which is funded by Wellcome. See Deciphering Developmental Disorders Study<sup>24</sup> or DDD website (see [web resources](#)) for full acknowledgment. This research was made possible through access to the data and findings generated by the 100,000 Genomes Project. The 100,000 Genomes Project is managed by Genomics England Limited (a wholly owned company of the Department of Health and Social Care). The 100,000 Genomes Project is funded by the National Institute for Health Research and NHS England. The Wellcome Trust, Cancer Research UK, and the Medical Research Council have also funded research infrastructure. The 100,000 Genomes Project uses data provided by patients and collected by the National Health Service as part of their care and support.

## Declaration of Interests

X.W. is an employee of Cipher Gene Ltd.

Received: August 12, 2020

Accepted: October 30, 2020

Published: November 26, 2020

## Web Resources

DDD study, <https://www.ddduk.org>

DECIPHER, <https://decipher.sanger.ac.uk>

Ensembl, <https://www.ensembl.org>

European Genome-phenome Archive (EGA), <https://www.ebi.ac.uk/ega>  
GenBank, <https://www.ncbi.nlm.nih.gov/genbank>  
GeneMatcher, <https://genematcher.org>  
Genome Aggregation Database (gnomAD), <https://gnomad.broadinstitute.org>  
Genomics England, <https://www.genomicsengland.co.uk>  
Human Protein Atlas, <https://www.proteinatlas.org>  
Online Mendelian Inheritance in Man (OMIM), <https://www.omim.org>  
VarCards, <http://159.226.67.237/sun/varcards/welcome/index>

## References

- Kaplan, D.I., Isom, L.L., and Petrou, S. (2016). Role of Sodium Channels in Epilepsy. *Cold Spring Harb. Perspect. Med.* 6, 6.
- Catterall, W.A. (2012). Voltage-gated sodium channels at 60: structure, function and pathophysiology. *J. Physiol.* 590, 2577–2589.
- McTague, A., Howell, K.B., Cross, J.H., Kurian, M.A., and Scheffer, I.E. (2016). The genetic landscape of the epileptic encephalopathies of infancy and childhood. *Lancet Neurol.* 15, 304–316.
- Siekierska, A., Isrie, M., Liu, Y., Scheldeman, C., Vanthillo, N., Lagae, L., de Witte, P.A.M., Van Esch, H., Goldfarb, M., and Buyse, G.M. (2016). Gain-of-function FHF1 mutation causes early-onset epileptic encephalopathy with cerebellar atrophy. *Neurology* 86, 2162–2170.
- Hamdan, F.F., Myers, C.T., Cossette, P., Lemay, P., Spiegelman, D., Laporte, A.D., Nassif, C., Diallo, O., Monlong, J., Cadieux-Dion, M., et al.; Deciphering Developmental Disorders Study (2017). High Rate of Recurrent De Novo Mutations in Developmental and Epileptic Encephalopathies. *Am. J. Hum. Genet.* 101, 664–685.
- EuroEPINOMICS-RES Consortium; Epilepsy Phenome/Genome Project; and Epi4K Consortium (2014). De novo mutations in synaptic transmission genes including DNMT1 cause epileptic encephalopathies. *Am. J. Hum. Genet.* 95, 360–370.
- Scheffer, I.E., Berkovic, S., Capovilla, G., Connolly, M.B., French, J., Guilhoto, L., Hirsch, E., Jain, S., Mathern, G.W., Moshé, S.L., et al. (2017). ILAE classification of the epilepsies: Position paper of the ILAE Commission for Classification and Terminology. *Epilepsia* 58, 512–521.
- Scheffer, I.E., and Liao, J. (2020). Deciphering the concepts behind “Epileptic encephalopathy” and “Developmental and epileptic encephalopathy”. *Eur. J. Paediatr. Neurol.* 24, 11–14.
- Goldfarb, M. (2005). Fibroblast growth factor homologous factors: evolution, structure, and function. *Cytokine Growth Factor Rev.* 16, 215–220.
- Goldfarb, M., Schoorlemmer, J., Williams, A., Diwakar, S., Wang, Q., Huang, X., Giza, J., Tchetchik, D., Kelley, K., Vega, A., et al. (2007). Fibroblast growth factor homologous factors control neuronal excitability through modulation of voltage-gated sodium channels. *Neuron* 55, 449–463.
- Pablo, J.L., Wang, C., Presby, M.M., and Pitt, G.S. (2016). Polarized localization of voltage-gated Na<sup>+</sup> channels is regulated by concerted FGF13 and FGF14 action. *Proc. Natl. Acad. Sci. USA* 113, E2665–E2674.
- Wittmack, E.K., Rush, A.M., Craner, M.J., Goldfarb, M., Waxman, S.G., and Dib-Hajj, S.D. (2004). Fibroblast growth factor homologous factor 2B: association with Nav1.6 and selective colocalization at nodes of Ranvier of dorsal root axons. *J. Neurosci.* 24, 6765–6775.
- Smallwood, P.M., Munoz-Sanjuan, I., Tong, P., Macke, J.P., Hendry, S.H., Gilbert, D.J., Copeland, N.G., Jenkins, N.A., and Nathans, J. (1996). Fibroblast growth factor (FGF) homologous factors: new members of the FGF family implicated in nervous system development. *Proc. Natl. Acad. Sci. USA* 93, 9850–9857.
- Olsen, S.K., Garbi, M., Zampieri, N., Eliseenkova, A.V., Ornitz, D.M., Goldfarb, M., and Mohammadi, M. (2003). Fibroblast growth factor (FGF) homologous factors share structural but not functional homology with FGFs. *J. Biol. Chem.* 278, 34226–34236.
- Sochacka, M., Opalinski, L., Szymczyk, J., Zimoch, M.B., Czyrek, A., Krowarsch, D., Otlewski, J., and Zakrzewska, M. (2020). FHF1 is a bona fide fibroblast growth factor that activates cellular signaling in FGFR-dependent manner. *Cell Commun. Signal.* 18, 69.
- Wang, C., Chung, B.C., Yan, H., Lee, S.-Y., and Pitt, G.S. (2012). Crystal structure of the ternary complex of a NaV C-terminal domain, a fibroblast growth factor homologous factor, and calmodulin. *Structure* 20, 1167–1176.
- Hartung, H., Feldman, B., Lovce, H., Coulier, F., Birnbaum, D., and Goldfarb, M. (1997). Murine FGF-12 and FGF-13: expression in embryonic nervous system, connective tissue and heart. *Mech. Dev.* 64, 31–39.
- Uhlén, M., Fagerberg, L., Hallström, B.M., Lindskog, C., Oksvold, P., Mardinoglu, A., Sivertsson, Å., Kampf, C., Sjöstedt, E., Asplund, A., et al. (2015). Proteomics. Tissue-based map of the human proteome. *Science* 347, 1260419.
- Liu, Y., Li, S., Tao, T., Li, X., Zhu, Q., Liao, Y., Ma, J., Sun, Y., and Liu, W. (2018). Intrafollicular fibroblast growth factor 13 in polycystic ovary syndrome: relationship with androgen levels and oocyte developmental competence. *J. Ovarian Res.* 11, 87.
- Wu, Q.-F., Yang, L., Li, S., Wang, Q., Yuan, X.-B., Gao, X., Bao, L., and Zhang, X. (2012). Fibroblast growth factor 13 is a microtubule-stabilizing protein regulating neuronal polarization and migration. *Cell* 149, 1549–1564.
- Favuzzi, E., Deogracias, R., Marques-Smith, A., Maeso, P., Jezequel, J., Exposito-Alonso, D., Balia, M., Kroon, T., Hinojosa, A.J.F., F Maraver, E., and Rico, B. (2019). Distinct molecular programs regulate synapse specificity in cortical inhibitory circuits. *Science* 363, 413–417.
- Park, D.S., Shekhar, A., Marra, C., Lin, X., Vasquez, C., Solinas, S., Kelley, K., Morley, G., Goldfarb, M., and Fishman, G.I. (2016). Fhf2 gene deletion causes temperature-sensitive cardiac conduction failure. *Nat. Commun.* 7, 12966.
- Sinden, D.S., Holman, C.D., Bare, C.J., Sun, X., Gade, A.R., Cohen, D.E., and Pitt, G.S. (2019). Knockout of the X-linked *Egf13* in the hypothalamic paraventricular nucleus impairs sympathetic output to brown fat and causes obesity. *FASEB J.* 33, 11579–11594.
- Deciphering Developmental Disorders Study (2015). Large-scale discovery of novel genetic causes of developmental disorders. *Nature* 519, 223–228.
- Sobreira, N., Schiettecatte, F., Valle, D., and Hamosh, A. (2015). GeneMatcher: a matching tool for connecting investigators with an interest in the same gene. *Hum. Mutat.* 36, 928–930.
- Genomics England (2019). The National Genomics Research and Healthcare Knowledgebase v5. <https://doi.org/10.6084/m9.figshare.4530893.v5>



27. Munoz-Sanjuan, I., Smallwood, P.M., and Nathans, J. (2000). Isoform diversity among fibroblast growth factor homologous factors is generated by alternative promoter usage and differential splicing. *J. Biol. Chem.* *275*, 2589–2597.
28. Puranam, R.S., He, X.P., Yao, L., Le, T., Jang, W., Rehder, C.W., Lewis, D.V., and McNamara, J.O. (2015). Disruption of Fgf13 causes synaptic excitatory-inhibitory imbalance and genetic epilepsy and febrile seizures plus. *J. Neurosci.* *35*, 8866–8881.
29. Karczewski, K.J., Francioli, L.C., Tiao, G., Cummings, B.B., Alföldi, J., Wang, Q., Collins, R.L., Laricchia, K.M., Ganna, A., Birnbaum, D.P., et al.; Genome Aggregation Database Consortium (2020). The mutational constraint spectrum quantified from variation in 141,456 humans. *Nature* *581*, 434–443.
30. Li, J., Shi, L., Zhang, K., Zhang, Y., Hu, S., Zhao, T., Teng, H., Li, X., Jiang, Y., Ji, L., and Sun, Z. (2018). VarCards: an integrated genetic and clinical database for coding variants in the human genome. *Nucleic Acids Res.* *46* (D1), D1039–D1048.
31. Venkatesan, K., Liu, Y., and Goldfarb, M. (2014). Fast-onset long-term open-state block of sodium channels by A-type FHF1 mediates classical spike accommodation in hippocampal pyramidal neurons. *J. Neurosci.* *34*, 16126–16139.
32. Bagal, S.K., Marron, B.E., Owen, R.M., Storer, R.I., and Swain, N.A. (2015). Voltage gated sodium channels as drug discovery targets. *Channels (Austin)* *9*, 360–366.
33. Dover, K., Solinas, S., D’Angelo, E., and Goldfarb, M. (2010). Long-term inactivation particle for voltage-gated sodium channels. *J. Physiol.* *588*, 3695–3711.
34. Rush, A.M., Wittmack, E.K., Tyrrell, L., Black, J.A., Dib-Hajj, S.D., and Waxman, S.G. (2006). Differential modulation of sodium channel Na(v)1.6 by two members of the fibroblast growth factor homologous factor 2 subfamily. *Eur. J. Neurosci.* *23*, 2551–2562.
35. Peters, H.C., Hu, H., Pongs, O., Storm, J.F., and Isbrandt, D. (2005). Conditional transgenic suppression of M channels in mouse brain reveals functions in neuronal excitability, resonance and behavior. *Nat. Neurosci.* *8*, 51–60.
36. Buchin, A., Kerr, C.C., Huberfeld, G., Miles, R., and Gutkin, B. (2018). Adaptation and Inhibition Control Pathological Synchronization in a Model of Focal Epileptic Seizure. *eNeuro* *5*, 5.
37. Laezza, F., Lampert, A., Kozel, M.A., Gerber, B.R., Rush, A.M., Nerbonne, J.M., Waxman, S.G., Dib-Hajj, S.D., and Ornitz, D.M. (2009). FGF14 N-terminal splice variants differentially modulate Nav1.2 and Nav1.6-encoded sodium channels. *Mol. Cell. Neurosci.* *42*, 90–101.
38. Lou, J.-Y., Laezza, F., Gerber, B.R., Xiao, M., Yamada, K.A., Hartmann, H., Craig, A.M., Nerbonne, J.M., and Ornitz, D.M. (2005). Fibroblast growth factor 14 is an intracellular modulator of voltage-gated sodium channels. *J. Physiol.* *569*, 179–193.
39. Goetz, R., Dover, K., Laezza, F., Shtraizent, N., Huang, X., Tchetchik, D., Eliseenkova, A.V., Xu, C.-F., Neubert, T.A., Ornitz, D.M., et al. (2009). Crystal structure of a fibroblast growth factor homologous factor (FHF) defines a conserved surface on FHF1 for binding and modulation of voltage-gated sodium channels. *J. Biol. Chem.* *284*, 17883–17896.
40. Carvill, G.L., Engel, K.L., Ramamurthy, A., Cochran, J.N., Rovers, J., Stamberger, H., Lim, N., Schneider, A.L., Hollingsworth, G., Holder, D.H., et al.; EuroEPINOMICS Rare Epilepsy Syndrome, Myoclonic-Astatic Epilepsy, and Dravet Working Group (2018). Aberrant Inclusion of a Poison Exon Causes Dravet Syndrome and Related SCN1A-Associated Genetic Epilepsies. *Am. J. Hum. Genet.* *103*, 1022–1029.
41. Epilepsy Genetics Initiative (2018). De novo variants in the alternative exon 5 of SCN8A cause epileptic encephalopathy. *Genet. Med.* *20*, 275–281.
42. Perenthaler, E., Niconcuk, A., Yousefi, S., Berdowski, W.M., Al-sagob, M., Capo, I., van der Linde, H.C., van den Berg, P., Jacobs, E.H., Putar, D., et al. (2020). Loss of UGP2 in brain leads to a severe epileptic encephalopathy, emphasizing that bi-allelic isoform-specific start-loss mutations of essential genes can cause genetic diseases. *Acta Neuropathol.* *139*, 415–442.
43. Bodian, D.L., Kothiyal, P., and Hauser, N.S. (2019). Pitfalls of clinical exome and gene panel testing: alternative transcripts. *Genet. Med.* *21*, 1240–1245.
44. Schoch, K., Tan, Q.K.-G., Stong, N., Deak, K.L., McConkie-Rosell, A., McDonald, M.T., Goldstein, D.B., Jiang, Y.H., Shashi, V.; and Undiagnosed Diseases Network (2020). Alternative transcripts in variant interpretation: the potential for missed diagnoses and misdiagnoses. *Genet. Med.* *22*, 1269–1275.
45. Rigby, K.A., van Hasselt, P.M., Burgess, R., Damiano, J.A., Mullen, S.A., Petrovski, S., Puranam, R.S., van Gassen, K.L.I., Gecz, J., Scheffer, I.E., et al. (2016). Is FGF13 a major contributor to genetic epilepsy with febrile seizures plus? *Epilepsy Res.* *128*, 48–51.
46. Al-Mehmadi, S., Splitt, M., Ramesh, V., DeBrosse, S., Dessoffy, K., Xia, E., Yang, Y., Rosenfeld, J.A., Cossette, P., Michaud, J.L., et al.; For DDD Study group\*; For CENet Study group† (2016). FHF1 (FGF12) epileptic encephalopathy. *Neurol. Genet.* *2*, e115.
47. Paprocka, J., Jezela-Stanek, A., Koppolu, A., Rydzanicz, M., Kosińska, J., Stawiński, P., and Płoski, R. (2019). FGF12p.Gly112Ser variant as a cause of phenytoin/phenobarbital responsive epilepsy. *Clin. Genet.* *96*, 274–275.
48. Trivisano, M., Ferretti, A., Bebin, E., Huh, L., Lesca, G., Siekierska, A., Takeguchi, R., Carneiro, M., De Palma, L., Guella, I., et al. (2020). Defining the phenotype of FHF1 developmental and epileptic encephalopathy. *Epilepsia* *61*, e71–e78.
49. Shi, R.-M., Kobayashi, T., Kikuchi, A., Sato, R., Uematsu, M., An, K., and Kure, S. (2017). Phenytoin-responsive epileptic encephalopathy with a tandem duplication involving *FGF12*. *Neurol. Genet.* *3*, e133.
50. Miura, S., Kosaka, K., Fujioka, R., Uchiyama, Y., Shimojo, T., Morikawa, T., Irie, A., Taniwaki, T., and Shibata, H. (2019). Spinocerebellar ataxia 27 with a novel nonsense variant (Lys177X) in FGF14. *Eur. J. Med. Genet.* *62*, 172–176.
51. van Swieten, J.C., Brusse, E., de Graaf, B.M., Krieger, E., van de Graaf, R., de Koning, I., Maat-Kievit, A., Leegwater, P., Dooijes, D., Oostra, B.A., and Heutink, P. (2003). A mutation in the fibroblast growth factor 14 gene is associated with autosomal dominant cerebellar ataxia [corrected]. *Am. J. Hum. Genet.* *72*, 191–199.
52. Gecz, J., Baker, E., Donnelly, A., Ming, J.E., McDonald-McGinn, D.M., Spinner, N.B., Zackai, E.H., Sutherland, G.R., and Mulley, J.C. (1999). Fibroblast growth factor homologous factor 2 (FHF2): gene structure, expression and mapping to the Börjeson-Forsman-Lehmann syndrome region in Xq26 delineated by a duplication breakpoint in a BFLS-like patient. *Hum. Genet.* *104*, 56–63.
53. Huang, N., Lee, I., Marcotte, E.M., and Hurles, M.E. (2010). Characterising and predicting haploinsufficiency in the human genome. *PLoS Genet.* *6*, e1001154.

54. Oda, Y., Uchiyama, Y., Motomura, A., Fujita, A., Azuma, Y., Harita, Y., Mizuguchi, T., Yanagi, K., Ogata, H., Hata, K., et al. (2019). Entire FGF12 duplication by complex chromosomal rearrangements associated with West syndrome. *J. Hum. Genet.* *64*, 1005–1014.
55. Villa, C., and Combi, R. (2016). Potassium Channels and Human Epileptic Phenotypes: An Updated Overview. *Front. Cell. Neurosci.* *10*, 81.
56. Miceli, F., Soldovieri, M.V., Ambrosino, P., De Maria, M., Migliore, M., Migliore, R., and Tagliatela, M. (2015). Early-onset epileptic encephalopathy caused by gain-of-function mutations in the voltage sensor of Kv7.2 and Kv7.3 potassium channel subunits. *J. Neurosci.* *35*, 3782–3793.
57. Hu, H., Vervaeke, K., and Storm, J.F. (2007). M-channels (Kv7/KCNQ channels) that regulate synaptic integration, excitability, and spike pattern of CA1 pyramidal cells are located in the perisomatic region. *J. Neurosci.* *27*, 1853–1867.
58. Hönigsperger, C., Marosi, M., Murphy, R., and Storm, J.F. (2015). Dorsoventral differences in Kv7/M-current and its impact on resonance, temporal summation and excitability in rat hippocampal pyramidal cells. *J. Physiol.* *593*, 1551–1580.

**Supplemental Data**

**Missense variants in the N-terminal domain of the A isoform  
of FHF2/FGF13 cause an X-linked  
developmental and epileptic encephalopathy**

**Andrew E. Fry, Christopher Marra, Anna V. Derrick, William O. Pickrell, Adam T. Higgins, Johann te Water Naude, Martin A. McClatchey, Sally J. Davies, Kay A. Metcalfe, Hui Jeen Tan, Rajiv Mohanraj, Shivaram Avula, Denise Williams, Lauren I. Brady, Ronit Mesterman, Mark A. Tarnopolsky, Yuehua Zhang, Ying Yang, Xiaodong Wang, Genomics England Research Consortium, Mark I. Rees, Mitchell Goldfarb, and Seo-Kyung Chung**

## Supplemental Note: Case Reports

### Individual 1

This male individual is the second child of unrelated White British parents. He has an older sister who is healthy and a younger sister (individual 2) who also has infantile-onset epilepsy and developmental delay. He was delivered by ventouse at full term following an uncomplicated pregnancy. His birth weight was 2.83 kg (-1.5 SD). In the first 24 hours of life he was noted to be restless and had four episodes of apnoea, cyanosis and lip smacking following feeds. His stomach and oesophagus were washed out to remove excess mucus. At 11 days of age he had another episode of apnoea and cyanosis. He was resuscitated and taken to hospital. Gastroesophageal reflux was suspected based on the results of a barium swallow.

At 4 months of age individual 1 had further events associated with staring, twitching of the right eye and posturing of his right arm. An MRI brain scan was normal, and an ictal electroencephalogram (EEG) showed sharp waves over his left temporal region. He had his first episode of convulsive status epilepticus at 7 months of age. He went on to develop slowly with no period of regression. At 8 months of age he could roll over with prompting but could not sit without support. He could reach out for objects directly in front of him. His seizures were characterised by staring, vomiting and lip twitching. Events lasted 10-20 seconds but occasionally up to 1 minute. His sleep was sometimes fragmented, with frequent episodes of inappropriate laughing or giggling. These were thought to be ictal.

By 9 months of age the seizures had evolved to start with a gag or vomit, and excess salivation. He would then swallow, his eyes would deviate to the right, and his right eye would twitch; they would end with a 'nervous' laugh. In some cases, he would hold his breath, become cyanosed and have a generalised seizure. On examination, his occipitofrontal circumference (OFC) was 44.5 cm (-1.5 SD). There was no overt laterality. His tone was slightly low. He was relatively inactive in terms of gross motor movements when placed prone or supine. He could, however, raise his head and upper trunk.



A further EEG at 9 months of age showed an asymmetric record with almost continuous discharge from the right temporal leads. The background amplitude was slightly higher than expected for his age. A diagnosis of epilepsy of infancy with migrating focal seizures was considered. However, the EEG findings were not felt to be consistent with this classification as there was no shifting of foci of ictal onset between hemispheres during the same EEG recording.

Individual 1 had a seizure-free period around 10-12 months of age (on lamotrigine, topiramate, vigabatrin and sodium valproate). Towards the end of this period the vigabatrin was stopped. This coincided with him becoming more alert and responsive. At 12 months of age he was more visually attentive and became more interested in toys but was not reaching out for them. He could stand with support. OFC at 12 months was 45.5 cm (-1.8 SD). His muscle tone continued to be slightly low. Eye examination at 13 months revealed symmetrical corneal reflexes with no nystagmus. His fundi were normal. He had slight astigmatism but it did not require correction. At 15 months of age he had 2 prolonged seizures, the first was predominantly left sided and lasted 45 minutes, and the second was predominantly right sided and lasted 30 minutes. This was in the context of him having an unspecified (possibly viral) illness.

On review at 20 months of age individual 1 was having around 3 seizures per week (this was after stopping lamotrigine). These typically occurred early in the morning and lasted for about a minute. He would initially vomit or gag, following which his head and eyes would deviate to the right. His right eye would twitch followed by twitching of his right arm. On examination, his tone was normal although his feet were still quite mobile and his back was quite rounded. OFC at 22 months was 46 cm (-3 SD).

A ketogenic diet was employed between 20-23 months of age however individual 1's seizure frequency increased. This coincided with a change of seizure morphology to include truncal flexion at the start of seizures. He would then start with focal involvement on the right which would spread to his face, with chewing. There was an element of retained awareness during these events.

At 24 months of age individual 1 was having about 25 seizures per month. The seizures were generally short and stereotyped. He would initially flex his trunk, followed by trembling and clawing at his face. He would then relax slightly, followed by a gustatory component (swallowing, chewing, jaw movement and vocalisation). Examination showed profuse drooling, low axial muscle tone and occasional athetoid and dystonic movements. A 24-hour EEG at 2 years of age captured a seizure during sleep. At onset there was diffuse alpha activity followed by rhythmical sharpened slow wave activity in the right posterior hemisphere leads, thereafter with diffuse slowing over both hemispheres. Interictal epileptiform activity was seen over the right posterior hemisphere. Clinically, the event lasted 4 minutes and manifested as deep breathing, with oromotor automatism. There was an ictal tachycardia.

At 29 months of age individual 1 was commando crawling and was aware of bottles put into his hands. His sleep pattern was still poor and he was treated with melatonin. The frequency of his focal seizures ranged from daily clusters to single isolated seizures once a week. The typical duration was 1-2 minutes but sometimes up to 3 minutes. Seizures involved head deviation to the left, eye twitching and repetitive swallowing. Both arms would flex but towards the left side of his body. He would then have a clonic phase and becoming dusky around the mouth. Events were usually nocturnal and he would go back to sleep afterwards. At 2½ years of age a vagus nerve stimulator (VNS) was fitted. This improved recovery from seizures but not the frequency. Individual 1 sat unaided at 4 years of age.

At 5 years of age individual 1 was not playing with toys but liked lights and to tap objects. He had a good appetite and fed orally. He could chew well but continued drooling. On examination, he had deep-set eyes but was not dysmorphic. He was well grown and had normal hand creases. His neurology was normal. OFC was 50 cm (-1.9 SD). Constipation was a persistent problem for individual 1 from infancy onwards. He had increasing problems with abdominal discomfort around the age of 7 years. Blood tests for celiac disease and thyroid function were normal. An EEG at age 8 years (on vigabatrin, sodium valproate, topiramate and oxcarbazepine) showed generalised spike-wave activity throughout.

At 8 years of age a barium meal and follow through concluded that he was grossly constipated, with poor colonic motility despite large doses of bulk-forming agents and bowel stimulants. At 9 years 10 months of age he underwent elective sub-total colectomy and ileostomy. However, the abdominal pain continued and at 11.5 years of age he had a laparotomy to divide adhesions and to release a stoma constriction. Post-operatively his weight was 36.4 kg (+0.0 SD) and he was feeding well orally. The revised stoma functioned well without difficulties. Despite the operations individual 1's abdominal pain continued in paroxysms every 7-9 days. Visceral hyperalgesia was raised as a possible explanation although the discomfort seemed to respond to an anti-spasmodic agent. His focal seizures continued during this period. Other seizure types included drop attacks and gelastic seizures in the early hours of the morning.

When reviewed at 13 years of age individual 1 could take his own weight when standing but was not walking independently. His parents felt his concentration had improved over the previous two years. Daily routines were important for him. He was not talking or pointing but had responsive eye gaze and vocalised when he wanted something. He would occasionally comfort rock, hand flap or hyperventilate. Examination at this stage showed that his weight was 55kg (+0.7 SD) and OFC 53.4 cm (-1.4 SD). He had mild scoliosis and gum hypertrophy. Neurological examination found low truncal tone, with tight hamstrings but no lateralising signs.

Individual 1 continued to have a range of seizure types. He had daily focal seizures and weekly generalised tonic-clonic seizures (GTCS). The focal seizures were short, typically 1-2 minutes. They were often associated with repeated swallowing or gagging, breath holding, and increased salivation. His arms would tighten and then start jerking. His head would turn to the right (or sometimes the left). He would go pale and his lips might go blue. Some events would begin with his throwing back his head, splaying out his arms, and shouting as if frightened. He would be happy with intermittent giggling afterwards, with mouth and eye twitching for a few minutes. With generalization the focal component would be followed by him going blank and extensor posturing. An asymmetric clonic phase would then follow, with his arms and legs jerking, particularly on the right. His face would become red and blotchy. These seizures were occasionally prolonged (10-90 minutes long). These were characterised by jaw, eye and limb twitching, and being very unresponsive. Sometimes he would vomit. His anticonvulsant therapy

included sodium valproate, phenobarbitone, gabapentin, zonisamide and buccal midazolam (as required).

Individual 1's genetic testing has included routine karyotype, array comparative genomic hybridization (aCGH), single gene testing for Fragile X syndrome, *CDKL5*, *SCN1A* (including dosage analysis) and a 134-gene infantile epilepsy panel. The results were all normal.

Summary of antiepileptic medications (Figure S2, current anticonvulsant drugs underlined):

Vigabatrin 4m(onths) – 11m (“alert and more responsive after coming off”), 26m – 113m

Sodium valproate 4m – 18m, 33m – 36m, 106m +

Lamotrigine 4m – 18m, 108m +

Topiramate 9m – 110m

Levetiracetam 18m – 24m

Oxcarbazepine 36m – 107m

Pregabalin 48m – 49m

Rufinamide 56m (“many jerks”), 105m (“made seizures worse”, “drugged up”), 108m – 149m

Sulthiame 63m – 72m (“less seizures after coming off”)

Clobazam 100m – 106m

Phenobarbital 107m, 113m – 173m

Gabapentin 154m +

Zonisamide 157m +

Perampanel 173m +

## Individual 2

This female individual is the third child of White British parents. She is the younger sister of individual 1. She was born by elective caesarean section at 39 weeks gestation following a uneventful pregnancy and required no special care. Cord pH was normal. Apgar scores were 9 at 1 minute and 10 at 5 minutes. Her biometry at birth was OFC 33 cm (-0.8 SD) and weight 3.13 kg (-0.2 SD). At 11 days of age she presented with several episodes of becoming dusky around



feeds and shallow breathing. She had a respiratory arrest. She was resuscitated, admitted to the Paediatric Intensive Care Unit and given a loading dose of phenobarbital. The apnoeic events stopped and she was discharged from hospital after 9 days. Gastroesophageal reflux was suspected and she was not given further anticonvulsant drugs at this stage. An interictal EEG at age 1 month was normal with no photosensitivity.

When reviewed at 7 weeks of age she was feeding and growing well. Her OFC was 37.5 cm (+0.5 SD) and weight 4.65 kg (+0.8 SD). She was smiling responsively and had good head control. Limb tone and movement were normal. Her parents thought she was able to do more than her brother at the same age. She sat unsupported at 7 months of age. An interictal EEG at 10 months of age was normal apart from a reduction of sleep spindle and beta activity over the left hemisphere. There was no photosensitivity. At 11 months of age individual 2 had an upper respiratory tract infection and started to have focal seizures. The seizures were similar to but less severe than her brother's. The seizures involved lip smacking, going dusky around the mouth, repeated swallowing movements, eye deviation to left, and facial twitching on the left side. There was no generalisation. Her development and neurological examination was normal.

Individual 2 walked unsupported at 15 months of age. An interictal EEG at 14 months found excess background slowing. Ophthalmology examination at 19 months of age was normal. A cranial MRI at 20 months of age was normal. By 21 months of age she was having clusters of seizures which lasted for about 2 days every 6 weeks. Her parents began to notice some slowing of her development compared to her peers. An EEG at 23 months (on sodium valproate and vigabatrin) showed diffuse fast activity in the majority of leads with some non-specific mixed slow waves over the central and posterior regions. No epileptiform activity was noted and there was no photosensitivity. At 24 months of age individual 2 was walking and running, but her gait was still immature. She had difficulty standing from sitting and had to pull herself up on furniture. She could finger feed and use a spoon. She was noted to have speech and language delay and drooled profusely. She said 'dada' and 'mama' but not consistently. She had recurrent episodes of otitis media and at 28 months she was diagnosed with bilateral middle ear effusions. The seizures continued and were often nocturnal.

Reviewed at 31 months she had mild developmental delay, no speech and drooled profusely. Her growth was normal and she had good eye contact. Her seizures were well controlled on vigabatrin and topiramate but her parents reported general cognitive decline. Her development was better than her brother and she had less seizure activity. At 3 years of age her motor skills were better than her language abilities. She could use a pincer grip and was precise with buttons. She could climb stairs while holding hands, drink from a feeder cup, smile and vocalise. On examination her OFC was 48 cm (-2.1 SD). She was not dysmorphic but had a high palate and was slightly prognathic.

At 3½ years of age her seizures increased in frequency. The seizures were focal and typically involve her gulping, gagging or vomiting. Her lips would go blue. She would then have eyes deviation to the left with mouth twitching. The seizures were short and she would recover quickly from them. A short interictal EEG at 3 years 6 months of age (on lamotrigine, levetiracetam and vigabatrin) found diffuse fast activity overlying slower rhythms but no focal events. At 3 years 8 months of age she had a generalised seizure at home which was similar in morphology to her brother's.

At 4 years of age she was having frequent short focal seizures sometimes as clusters and sometimes as single isolated events. Her seizures were associated with eye deviation to the left (or sometimes right), lips going blue, and often ictal vomiting. They did not generalise. Her weight was 18.41 kg (+1.0 SD) and height 105.4 cm (+1.0 SD). EEG at 4 years of age showed diffuse fast activity mixed with non-specific slow wave activity but no definite epileptiform activity. Around 4½ to 5½ years of age she had a prolonged seizure-free period of several months on vigabatrin, sodium valproate and lamotrigine (after switching from vigabatrin, lamotrigine, phenobarbital and phenytoin). The mild developmental delay persisted. She was noted to have limited social communication. She was friendly but her behaviour was often challenging. Eye examination at 5 years of age was normal.

At 6 years of age individual 2 was having clusters of seizures every 5 or 6 weeks. She had a pervasive developmental behaviour pattern in contrast to her brother who had profound developmental delay. Her seizures typically had a left-sided focal onset, occasionally with

generalization. Her seizures were usually accompanied by vomiting and cyanosis. On examination, her neurology was normal. Her gait stability had improved. OFC was 53.5 cm (+0.8 SD) and weight 23.48 kg (+0.3 SD).

At 7 years of age individual 2's social and communication skills were assessed to be at the level of 1 year 2 months while her motor skills were equivalent to 1 year 9 months. Autistic features were noted. Her height was 121.6 cm (+0.1 SD) and weight 27 kg (+1.0 SD). She had been seizure free for several months on lamotrigine and sodium valproate but then began having clusters of seizures again. Repeat MRI brain found atrophic changes particularly affecting the left parietal and occipital regions. An ictal EEG suggested a left fronto-temporal origin. Fluorodeoxyglucose positron emission tomography (FDG PET) found reduced uptake of tracer in the mesial and anterior temporal lobe on the left. Uptake elsewhere was normal. Individual 2 underwent left anterior temporal lobectomy and partial amygdalo-hippocampotomy at the age of 7 years 7 months of age.

At 8 years 9 months of age individual 2's social and communication skills were at the level of 1 year 6 months and motor skills at the level of 22-24 months. Her height was 132.8 cm (+0.2 SD) and weight 27.4 cm (-0.2 SD). EEG at 8 years and 10 months of age (on sodium valproate and lamotrigine) found only isolated sharp waves with phase reversal over the left hemisphere. There was no photosensitivity. Her seizures were well controlled at this stage and the lamotrigine was discontinued at 8 years and 11 months of age.

At 9 years of age she was being educated in a special needs school. She was described as having a pervasive developmental disorder. Eye examination was normal with a minimal degree of hypermetropia. The brain surgery had helped for 2 years but attempts to wean her sodium valproate coincided with a recurrence of seizures. During seizures individual 2 would frown, become slightly confused, gag and sometimes vomit. Her right eye would start to twitch and this would often continue throughout the seizure. Her right arm and right leg would become weak and she would fall. She would become blue around the mouth, repeatedly swallow and smack her lips. Her whole body would jerk repeatedly. Seizures would occur at night or when she was unwell. Her weight at 10 years of age was 36.8 kg (+0.7 SD).

A review when she was 11½ years of age showed that individual 2 was able to use about 30 words and sing nursery rhymes. She was noted to have autistic features. Routines were important for her but she had good eye contact. She would lead people to objects she wanted. She was affectionate but often became frustrated and aggressive which was challenging for her family. There were no concerns about her vision or hearing. She was having occasional seizures associated with lip smacking, swallowing, asymmetric limb jerking (more on right side), with the event ending with her screaming. Neurological examination was normal.

Individual 2's genetic tests have included aCGH, single gene testing for *ARX* and *FOXG1*, and a 30-gene infantile epilepsy panel. The results were all normal. Her other investigations have included a full suite of blood, urine and CSF investigations. The results were all normal. Echocardiography at 1 month of age found a tiny patent foramen ovale. Renal scan at 2 years 3 months of age was normal.

Summary of antiepileptic medications (Figure S3, current anticonvulsant drugs underlined):

|                         |                                                                                                             |
|-------------------------|-------------------------------------------------------------------------------------------------------------|
| <u>Sodium valproate</u> | 11-26 m(onths), 55m+ (long seizure-free period after re-introduction)                                       |
| Oxcarbazepine           | 14 m, 50m (no response, possibly more seizures on withdrawal)                                               |
| <u>Clobazam</u>         | Intermittent (no response)                                                                                  |
| Phenobarbital           | Infancy, 52 m (irritable after loading)/                                                                    |
| Vigabatrin              | 17m - 72m (initially reduced seizures frequency, difficult to wean)                                         |
| Levetiracetam           | 21m -25m, 39m-43m (some response to increased dose, better developmental progress after coming off)         |
| Topiramate              | 26m -33m (good control with vigabatrin and high dose topiramate, but parents reported cognitive impairment) |
| <u>Lamotrigine</u>      | 31m - 108m, 155m+ (stopped after epilepsy surgery but recently restarted)                                   |
| Ethosuximide            | 46m -49m (no response)                                                                                      |
| Phenytoin               | 54m -55m                                                                                                    |
| Lacosamide              | 67m - 70m (very sleepy)                                                                                     |
| Rufinamide              | 70m                                                                                                         |



|                 |                                                      |
|-----------------|------------------------------------------------------|
| Eslicarbazepine | 135m ("not really successful")                       |
| Perampanel      | 147m - 151m (no seizures but behaviour deteriorated) |
| Pregabalin      | 151m                                                 |

### Individual 3

This male individual (Decipher ID 260211) is the first child of unrelated White British parents. He has two younger brothers, the youngest of whom (individual 4) also has early-onset epilepsy and developmental delay. Echogenic intracardiac foci were noted at 20 weeks gestation. He was delivered by ventouse following a prolonged labour at 39 weeks gestation. His birth weight was 3.4 kg (+0.1 SD). He did not require special care and was discharged home at 2 days of age. He presented at 1 month of age with persistent sleepiness and poor feeding. He had a septic screen including a lumbar puncture. It was noted on the ward that he was having recurrent apnoea (episodes of oxygen desaturation to 49%) and demonstrated some jerks and tonic posturing. It was concluded he was having seizures. He was sedated and ventilated. He was discharged home after a few days.

At 2 months of age individual 3 had further episodes of hand stiffness and grunting. He was diagnosed with focal seizures. The seizure morphology evolved to include brief tonic spasms. By 6 months of age he was having full flexor spasms. EEG confirmed hypsarrhythmia. Treatment with steroids and vigabatrin did not help. Individual 3 had global developmental delay and sat at 2 years of age. He subsequently developed severe scoliosis.

Individual 3 had a tonsillectomy at 5 years of age. He was noted to have an intermittent squint at 7 years. He was educated in a special needs school. Puberty started early, at 9-10 years, with hair development. He had an orchidopexy at 14 years of age. Brain MRI was reported to be normal. EEG showed a slow spike wave background consistent with Lennox–Gastaut syndrome.

Individual 3 was last reviewed at 19 years of age. He had severe learning disability, cortical visual impairment, and autism spectrum disorder. He could walk short distances with a frame. He tends to kneel-sit and could move around the floor in that position. He was very sensitive to

touch sensations. Individual 3 was non-verbal but vocalised and seemed to understand things that were said to him. He laughed when spoken to. He reached out for objects. He fed on soft solid food by mouth but required one-to-one feeding. He had severe gastroesophageal reflux disease. There had been three episodes of pneumonia over the previous two years. Individual 3 had periods of oral refusal possibly due to seizure activity or increased distress through constipation, leading to severe dehydration. Gastrostomy was being considered. He was not yet toilet trained. He was prone to chronic constipation. This required enemas and large doses of Movicol and washouts. Individual 3 also had hay fever and an urticarial reaction to peanuts.

Individual 3 had not had periods of regression or episodes of non-convulsive status epilepticus (NCSE) like in his brother. He had a VNS implanted. His seizure types included frequent brief absences with lip quivering (e.g. 1-2 per hour), GTCS, head drops associated with colour change and then anger, and previous gelastic seizures. Individual 3 had frequent myoclonic jerks during sleep often associated with grunting. Fever did not increase seizures frequency. His seizures were less of a problem when ill. On examination, individual 3 had limited eye contact, low truncal tone, no tremor, gum hypertrophy, and scoliosis. His hand creases were normal. He had 4 café au lait marks including a prominent one (~8 cm) on his back. His weight was 68 kg (-0.1 SD) and OFC 57 cm (-0.2 SD).

Individual 3's genetic tests have included aCGH, and single gene testing for *ARX* and *MECP2*.

Summary of antiepileptic medications (current anticonvulsant drugs underlined): phenytoin, vigabatrin, lacosamide, clobazam, clonazepam, cannabidiol, perampanel (caused agitation), sodium valproate, levetiracetam (on 2-3 occasions), carbamazepine, topiramate, rufinamide, zonisamide, brivaracetam and buccal midazolam (as rescue medication).

#### Individual 4

This male individual (Decipher ID 260212) is the third child of White British parents. He is the youngest brother of individual 3. Left-sided renal pelvis dilatation was diagnosed antenatally. He was born by elective caesarean section at 38 weeks gestation. He struggled with abdominal

pains, constipation, and gastroesophageal reflux as a baby but these improved over time. He presented with seizures at 6 months of age. These were described as brief focal seizures with his head and neck turning usually to the right with a clicking noise or licking of his lips. He sat at 11 months and walked at 15 months. Concerns mainly revolved around his communication from early on as he was never verbal.

Treatment with levetiracetam was started after one year of age and he was well controlled on this until 2½ years of age when valproate was added. At 2½ years of age he had a cluster of seizures associated with pyelonephritis and respiratory syncytial virus infection. The seizures were associated with vomiting, apnoea and cyanosis. The seizures were terminated with intravenous phenytoin and he was then put on maintenance phenytoin. Following this he developed NCSE and was noted to have epileptic spasms. His development regressed so that he could no longer sit, stand or feed himself. Intravenous lorazepam helped but his epileptic spasms and atypical absences became more intrusive. He was started on prednisolone, following which there was an improvement in his behaviour, functioning and seizures.

Individual 4 had further admissions over the next few months. He was having multiple GTCS per day. His EEG at 2 years 7 months showed a modified hypsarrhythmia (high amplitude delta activity with frequent sharp and slow wave complexes, consistent with an epileptic encephalopathy). He was started on pyridoxine and pyridoxal phosphate without improvement. Seizures recurred following weaning of prednisolone with facial twitching, hypersalivation, epileptic spasms, and tonic seizures. A gastrostomy was placed due to poor feeding.

At 3 years and 2 months of age he was admitted again with suspected NCSE. Medication changes improved his clinical state but he has been admitted occasionally (once or twice a year) since then diagnosed either clinically or on EEG to have NCSE. A medium-chain triglyceride (MCT)-based ketogenic diet was introduced at 3 years and 10 months of age. There was marked improvement in alertness over the next 6 weeks. However, he was worse when reviewed at 4 years and 1 month of age. The ketogenic diet was changed to a classical diet at 4 years and 5 months of age and weaned off at 4 years and 10 months of age. He was reluctant to walk, suck or swallow during this period. He experienced recurrent urinary tract infections despite prophylactic

trimethoprim. DMSA indicated that one kidney had 30% of normal function. He underwent unilateral nephrectomy at 4 years of age.

At 10½ years of age, individual 4 had worsening seizures. He had been on nitrazepam and this was converted to clobazam. He was admitted for frequent tonic seizures and was given intravenous phenobarbitone. Maintenance phenobarbitone was started at 10 years and 10 months of age. He had a relatively stable period of several months on a combination of valproate, clobazam and lacosamide. He was still having several seizures per week but was generally happy and alert.

At 11 years and 4 months of age he deteriorated and was re-admitted to hospital. He was having up to 300 atypical absence seizures per day. EEG revealed almost continuous generalised spike and slow wave activity. Ambulatory EEG was consistent with Lennox-Gastaut syndrome. He was having a mixture of atypical absences, tonic spasms and some tonic seizures. There was an attempt to wean him off nitrazepam, lacosamide and, subsequently, phenobarbitone. However, his seizures increased (occurring every few minutes), and he required HDU admission for intravenous midazolam. He was gradually weaned onto oral diazepam which proved useful. Ethosuximide and cannabidiol were started. Following weaning of the diazepam he again had frequent absence seizures and increased tonic seizures (up to 20+ per day). These improved with intravenous phenobarbitone and lorazepam. His functioning reduced markedly, and he became very subdued. He had prolonged periods of inactivity and looking glazed. This was unusual for individual 4 who was usually very active. Repeat EEG showed NCSE. Clobazam was recommenced leading to significant improvement and he was discharged after 2 months in hospital. There were concerns about retching and vomiting towards the end of this inpatient stay. He was fed partly orally and partly by gastrostomy. He was treated with ondansetron, omeprazole and domperidone. A pH study showing slight reflux to the upper oesophagus

At 11 years and 8 months of age individual 4 was admitted again for several weeks. Initially, he was having up to 70 tonic seizures overnight which improved following an increase in clobazam. Due to concerns about self-mutilating behaviour, and subsequent raised  $\gamma$ -glutamyl transferase



(GGT) and alanine aminotransferase (ALT) he was slowly weaned off clobazam. He continued to be on sodium valproate although this was reduced slightly prior this prolonged admission.

Individual 4 was last reviewed at 12 years of age. He had severe intellectual disability and an autism spectrum disorder. He continued to have prolonged admissions for recurrent episodes of NCSE associated with frequent vomiting. He lost motor skills during periods of frequent seizures. When he was well, he could walk independently, though he required supervision and often one-hand support. He would have eye contact and smile responsively as well as vocalise. He did not have recognisable speech. He often ground his teeth. He had not experienced early puberty. Individual 4 was suspected to have cortical visual impairment. He walked with a broad-based unsteady gait. On examination he had eczema, hypermobile joints and mild hirsutism. Neurologically he had low truncal tone, mild scoliosis, tight hamstrings but no lateralising signs. His weight was 39 kg (+0.1 SD) and OFC 53 cm (-1.3 SD).

Individual 4's genetic tests have included aCGH, and single gene testing for *SLC2A1* and *STXBPI*. Other investigations with normal results have included CSF neurotransmitters and pyridoxal phosphate, muscle biopsy (histopathology and respiratory chain enzymes), urine AASA and transferrin isoelectric focusing. Brain MRI scan at 1½ years of age was normal. Brain MRI at 12 years of age showed slight cerebellar volume loss and decreased volume of the splenium of the corpus callosum. There was a small arachnoid cyst in the left middle cranial fossa. There was possible increased signal and swelling of the hippocampi bilaterally which may have reflected seizure activity. Individual 4 had a 3T MRI brain scan at 13 years of age which showed symmetrical T2 hyperintensity of the hippocampal body and head with loss of definition of the internal architecture on all the sequences. There was no evidence of underlying diffusion restriction. Review of a previous MRI scan from 2½ years of age showed similar changes.

Summary of antiepileptic medications (current anticonvulsant drugs underlined): sodium valproate, levetiracetam, ethosuximide (caused vomiting), topiramate, lacosamide, rufinamide (caused vomiting), lamotrigine (associated with nonconvulsive status), phenytoin (not used since 2½ years of age due to concerns that it resulted in NCSE when maintenance dose was given), phenobarbital (some benefit though not significant recently with tonic or absence seizures),

clobazam (useful for NCSE), nitrazepam (longstanding use), prednisolone (none since 2 years of age), lorazepam (used for NCSE and improved tonic seizures), diazepam, cannabidiol (Epidyolex), zonisamide.

### Individual 5

This male individual is the first child of unrelated White Canadian parents. He was born by spontaneous vaginal delivery following an uncomplicated pregnancy at 39+3 weeks gestation. His biometry at birth was weight 3.67 kg (+0.7 SD), OFC 36.5 cm (+1.5 SD) and length 53.5 cm (+1.7 SD). He had mild hyperbilirubinemia which did not require treatment. There was no arthrogryposis or talipes. He began having seizures at 5 days of age. These involved repetitive right eye blinking, gaze and head deviation, repetitive swallowing and clicking noises. Seizures lasted 1 to 2 minutes and occurred 1 to 5 times a day. MRI brain at 1 month of age found no structural abnormalities and no evidence of acute ischemia. EEG was abnormal and showed epileptiform discharges from the right temporal region and independent epileptiform discharges from the left temporal region. This suggests multiple epileptogenic foci. Some of the events were associated with leg twitching.

Individual 5 smiled social at 8 weeks of age but underwent a period of regression around 4 months of age. Individual 5 was last reviewed at 2 years and 3 months of age. He had severe developmental delay. He was not talking, sitting or standing independently. He would occasionally (but not consistently) fix and follow light. Individual 5 was gastrostomy fed due to problems with suck and swallow coordination. He had constipation, cortical visual impairment, moderate conductive hearing loss, hypothyroidism, osteopenia, and gastroesophageal reflux disease. He continued to have focal dyscognitive seizures. Individual 5 had periodic abnormal posturing (decorticate and opisthotonus) as well as dystonic episodes and myoclonus. On examination, individual 5 was not dysmorphic. Growth parameters (at 22 months of age) were weight 15.8 kg (+2.4 SD) and OFC 48.5 cm (-1.1 SD). Neurological examination found generalised hypotonia with no contractures or scoliosis. His knee reflexes were normal with no clonus. He had exotropia with normal fundi.

Individual 5's most recent EEG was done at 2 years of age. This showed almost continuous 1.5-2 Hz sharp and slow wave complexes during sleep and also appearing frequently during wakefulness. The electroclinical features were suggestive of Lennox-Gastaut syndrome.

Individual 5's genetic testing has included aCGH and epilepsy gene panel (Courtagen epiSEEK) which were both normal. Extensive metabolic investigation including lactate, plasma amino acids, urine organic acids and urine metabolic screen were all negative.

Summary of antiepileptic medications:

Phenobarbital, valproic acid (individual 5 experienced abdominal pain with valproic acid), clobazam, rufinamide, levetiracetam, ACTH, cannabis, vigabatrin, lamotrigine, topiramate, and the ketogenic diet. Nothing has worked well to date - new medications and doses are still being tried.

### Individual 6

This male individual (Decipher ID 264848) is the child of unrelated white British parents. He has a brother with infantile-onset epilepsy, developmental delay and behavioural problems, and a maternal aunt diagnosed with cerebral palsy and epilepsy. Further clinical evaluation or genetic testing of individual 6's brother or parents has not been possible.

The pregnancy with the individual 6 was uncomplicated. Scans were normal during pregnancy and there was no bleeding. He was born by spontaneous vaginal delivery at 38 weeks gestation. His birth weight was 2.6 kg (-1.2 SD). He was admitted to the neonatal unit within 24 hours following a cyanotic episode. Investigations showed gastroesophageal reflux and he was treated with Gaviscon. He was discharged home after 3 weeks. His mother continued to be concerned during infancy about the number of cyanotic episodes individual 6 was having. After several months he was admitted to hospital. In retrospect, it was realised the cyanotic episodes may have been seizures. In addition, he was found to have an atrial septal defect.

Individual 6 went on to be diagnosed with global developmental delay, seizures, and autism. He sat at 1 year and walked at 2 years and 3 months. Individual 6 was last assessed at 5 years 8

months. His OFC was 49 cm (-2.6 SD). His examination findings included strabismus and coarse facial features. Genetic investigations of individual 6 have included aCGH and testing for Fragile X syndrome. The results were normal.

### Individual 7

This male individual is the child of consanguineous Chinese parents (half-first cousins). He had a family history of epilepsy in a paternal grand uncle. He was delivered by Caesarean section at 35+2 weeks gestation following an uncomplicated pregnancy. His birth weight was 2.5 kg (+0.1 SD). There were no concerns in the neonatal period. Individual 7 smiled socially at 3 months, sat unsupported at 9 months and walked independently at 13 months. The first concerns were at 6 months of age when he developed focal seizures.

Individual 7 experienced a period of regression at 14 months of age. He lost the ability to walk, sit, or smile socially. EEG at 1 year and 11 months of age showed generalized spike and slow-spike waves. There was atypical hypsarrhythmia and intermittent burst suppression during sleep. Clusters and isolated spasms were detected when he was awake. At 3 years and 2 months his head circumference was 48cm (-2.6 SD).

Individual 7 was last reviewed at 5 years and 8 months old. He had severe developmental delay and intractable epilepsy. He was not yet talking, walking or toilet trained. He was fed orally with pureed food, but choking was a frequent problem. He had problems with sleep disturbance. His predominant seizure type are focal seizures. He has also had myoclonic seizures, epileptic spasms and GTCS. On examination his length was 110 cm (-0.8 SD) and weight 18kg (-0.9 SD). Neurological examination found limb hypertonia with positive Babinski sign and ankle clonus. There was no strabismus, joint contractures or abnormal movements.

Individual 7's genetic testing has included aCGH. The results were normal. Metabolic investigations were also negative. Brain MRI at 3 years and 2 months of age showed cerebral cortex atrophy with bilaterally enlarged ventricles.

Summary of antiepileptic medications (current anticonvulsant drugs underlined): Levetiracetam, valproate, clonazepam, carbamazepine (made symptoms worse), zonisamide (worked well), oxcarbazepine, lamotrigine (allergic reaction), ACTH (worked well).

## Genomics England Research Consortium

Ambrose, J. C.,<sup>1</sup> Arumugam, P.,<sup>1</sup> Baple, E. L.,<sup>1</sup> Bleda, M.,<sup>1</sup> Boardman-Pretty, F.,<sup>1,2</sup> Boissiere, J. M.,<sup>1</sup> Boustred, C. R.,<sup>1</sup> Brittain, H.,<sup>1</sup> Caulfield, M. J.,<sup>1,2</sup> Chan, G. C.,<sup>1</sup> Craig, C. E. H.,<sup>1</sup> Daugherty, L. C.,<sup>1</sup> de Burca, A.,<sup>1</sup> Devereau, A.,<sup>1</sup> Elgar, G.,<sup>1,2</sup> Foulger, R. E.,<sup>1</sup> Fowler, T.,<sup>1</sup> Furió-Tarí, P.,<sup>1</sup> Giess A.,<sup>1</sup> Hackett, J. M.,<sup>1</sup> Halai, D.,<sup>1</sup> Hamblin, A.,<sup>1</sup> Henderson, S.,<sup>1,2</sup> Holman, J. E.,<sup>1</sup> Hubbard, T. J. P.,<sup>1</sup> Ibáñez, K.,<sup>1,2</sup> Jackson, R.,<sup>1</sup> Jones, L. J.,<sup>1,2</sup> Kasperaviciute, D.,<sup>1,2</sup> Kayikci, M.,<sup>1</sup> Kousathanas, A.,<sup>1</sup> Lahnstein, L.,<sup>1</sup> Lawson, K.,<sup>1</sup> Leigh, S. E. A.,<sup>1</sup> Leong, I. U. S.,<sup>1</sup> Lopez, F. J.,<sup>1</sup> Maleady-Crowe, F.,<sup>1</sup> Mason, J.,<sup>1</sup> McDonagh, E. M.,<sup>1,2</sup> Moutsianas, L.,<sup>1,2</sup> Mueller, M.,<sup>1,2</sup> Murugaesu, N.,<sup>1</sup> Need, A. C.,<sup>1,2</sup> Odhams, C. A.,<sup>1</sup> Orioli A.,<sup>1</sup> Patch, C.,<sup>1,2</sup> Perez-Gil, D.,<sup>1</sup> Pereira, M. B.,<sup>1</sup> Polychronopoulos, D.,<sup>1</sup> Pullinger, J.,<sup>1</sup> Rahim, T.,<sup>1</sup> Rendon, A.,<sup>1</sup> Riesgo-Ferreiro, P.,<sup>1</sup> Rogers, T.,<sup>1</sup> Ryten, M.,<sup>1</sup> Savage, K.,<sup>1</sup> Sawant, K.,<sup>1</sup> Scott, R. H.,<sup>1</sup> Siddiq, A.,<sup>1</sup> Sieghart, A.,<sup>1</sup> Smedley, D.,<sup>1,2</sup> Smith, K. R.,<sup>1,2</sup> Smith, S. C.,<sup>1</sup> Sosinsky, A.,<sup>1,2</sup> Spooner, W.,<sup>1</sup> Stevens, H. E.,<sup>1</sup> Stuckey, A.,<sup>1</sup> Sultana, R.,<sup>1</sup> Tanguy M.,<sup>1</sup> Thomas, E. R. A.,<sup>1,2</sup> Thompson, S. R.,<sup>1</sup> Tregidgo, C.,<sup>1</sup> Tucci, A.,<sup>1,2</sup> Walsh, E.,<sup>1</sup> Watters, S. A.,<sup>1</sup> Welland, M. J.,<sup>1</sup> Williams, E.,<sup>1</sup> Witkowska, K.,<sup>1,2</sup> Wood, S. M.,<sup>1,2</sup> Zarowiecki, M.,<sup>1</sup>

1. Genomics England, London, UK
2. William Harvey Research Institute, Queen Mary University of London, London, EC1M 6BQ, UK.

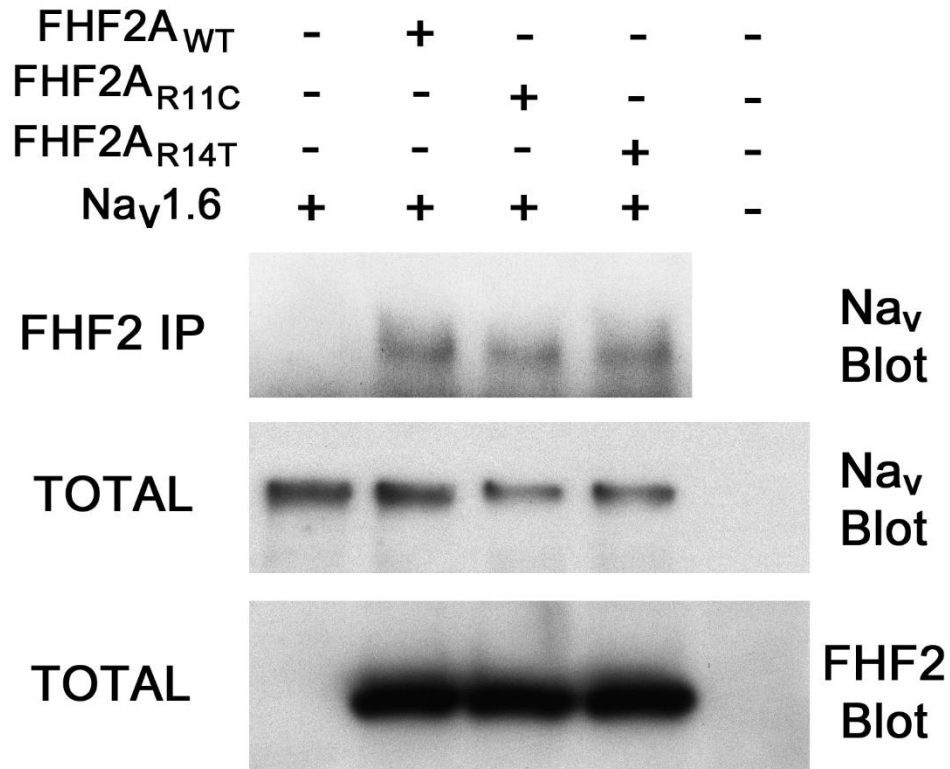

**Figure S1. FHF2<sub>WT</sub>, FHF2<sub>R11C</sub> and FHF2<sub>R14T</sub> proteins interact with Na<sub>v</sub>1.6.** Neuro2A cells were transiently transfected with expression vectors indicated at top of figure. Total lysates or anti-FHF2 immunoprecipitates (IP) were subjected to gel electrophoresis and immunoblotting with anti-FHF2 or anti-pan-Na<sub>v</sub> antibodies. Na<sub>v</sub>1.6 is detected in anti-FHF2 immunoprecipitates from cells expressing FHF2<sub>WT</sub>, FHF2<sub>R11C</sub> or FHF2<sub>R14T</sub>.



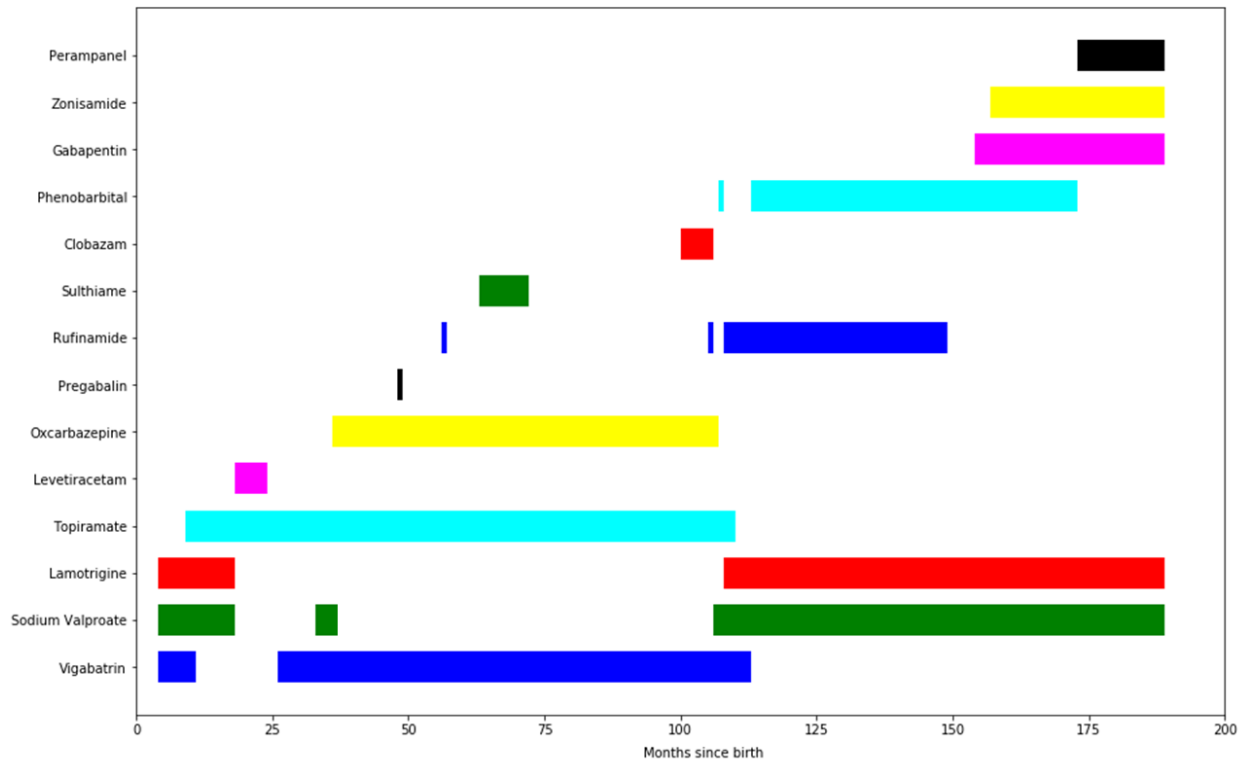

**Figure S2. Antiepileptic medications given to individual 1.** Timeline illustrating the combinations of anticonvulsant drugs (vertical axis) used to treat individual 1 from birth to last review.

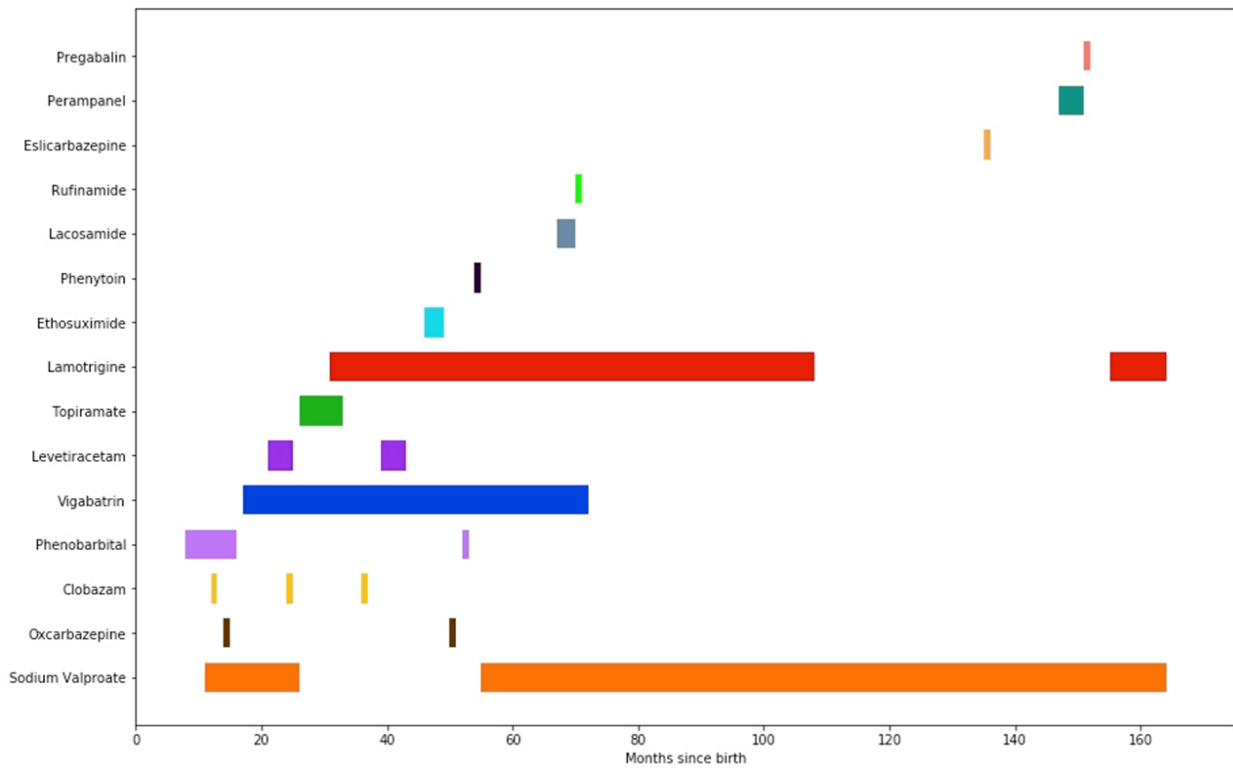

**Figure S3. Antiepileptic medications given to individual 2.** Timeline illustrating the combinations of anticonvulsant drugs (vertical axis) used to treat individual 2 from birth to last review.

| Algorithm         | Variant <i>FHF2</i> , c.31C>T, p.(Arg11Cys) |                   | Variant <i>FHF2</i> , c.41G>C, p.(Arg14Thr) |                   | Variant <i>FHF2</i> , c.32G>C, p.(Arg11Pro) |                 |
|-------------------|---------------------------------------------|-------------------|---------------------------------------------|-------------------|---------------------------------------------|-----------------|
|                   | Score                                       | Prediction        | Score                                       | Prediction        | Score                                       | Prediction      |
| SIFT              | 0.001                                       | Damaging          | 0                                           | Damaging          | 0.057                                       | Tolerable       |
| Polyphen-2 (HDIV) | 1                                           | Probably damaging | 0.875                                       | Possibly damaging | 0.276                                       | Benign          |
| Polyphen-2 (HVAR) | 0.983                                       | Probably damaging | 0.58                                        | Possibly damaging | 0.212                                       | Benign          |
| LRT               | -                                           | -                 | -                                           | -                 | -                                           | -               |
| MutationTaster    | 1                                           | Disease causing   | 1                                           | Disease causing   | 1                                           | Disease causing |
| MutationAssessor  | 1.935                                       | Low               | 1.935                                       | Low               | 1.935                                       | Low             |
| FATHMM            | -1.94                                       | Damaging          | -1.92                                       | Damaging          | -1.93                                       | Damaging        |
| PROVEAN           | -2.27                                       | Tolerable         | -1.99                                       | Tolerable         | -1.96                                       | Tolerable       |
| VEST3             | 0.791                                       | Damaging          | 0.702                                       | Damaging          | 0.872                                       | Damaging        |
| MetaSVM           | 0.383                                       | Damaging          | 0.305                                       | Damaging          | 0.087                                       | Damaging        |
| MetaLR            | 0.666                                       | Damaging          | 0.594                                       | Damaging          | 0.548                                       | Damaging        |
| M-CAP             | 0.473                                       | Damaging          | 0.388                                       | Damaging          | 0.322                                       | Damaging        |
| CADD              | 22.4                                        | Damaging          | 22.9                                        | Damaging          | 22.8                                        | Damaging        |
| DANN              | 0.999                                       | Damaging          | 0.973                                       | Tolerable         | 0.994                                       | Damaging        |
| FATHMM_MKL        | 0.893                                       | Damaging          | 0.97                                        | Damaging          | 0.97                                        | Damaging        |
| Eigen             | -                                           | -                 | -                                           | -                 | -                                           | -               |
| GenoCanyon        | 1                                           | Damaging          | 1                                           | Damaging          | 1                                           | Damaging        |
| fitCons           | -                                           | -                 | -                                           | -                 | -                                           | -               |
| GERP++            | 3.36                                        | Conserved         | 4.29                                        | Conserved         | 4.29                                        | Conserved       |
| phyloP            | 2.668                                       | Conserved         | 7.364                                       | Conserved         | 7.364                                       | Conserved       |
| phastCons         | 1                                           | Conserved         | 1                                           | Conserved         | 1                                           | Conserved       |
| SiPhy             | 10.765                                      | Nonconserved      | 15.342                                      | Conserved         | 15.342                                      | Conserved       |
| REVEL             | 0.697                                       | Damaging          | 0.733                                       | Damaging          | 0.687                                       | Damaging        |
| ReVe              | 0.889                                       | Damaging          | 0.863                                       | Damaging          | 0.918                                       | Damaging        |
| ClinPred          | 0.86299818                                  | Pathogenic        | 0.90703922                                  | Pathogenic        | 0.812778                                    | Pathogenic      |

**Table S1. Results of *in silico* prediction tools for the three *FHF2* (NM 004114.5) missense variants.**

## Supplemental Material and Methods

### Electrophysiology and immunochemical analyses of plasmid-transfected Neuro2A cells

All procedures parallel those we have described previously.<sup>1,2</sup> The Nav1.6 expression plasmid (pIRESneo3-Nav1.6<sup>TTXr</sup>) bears the tetrodotoxin (TTX) binding site substitution Y371S, rendering the channel resistant to TTX. FHF2A/GFP bicistronic expression plasmid pIRES2-FHF2A-ZsGreen drives coexpression of untagged FHF2A and green fluorescent protein, while pIRES2-ZsGreen expresses fluorescent protein only. Missense substitutions p.R11C or p.R14T were introduced into the pIRES2-FHF2A-ZsGreen plasmid using complementary mutagenic primers and PfuTurbo DNA Polymerase (Agilent).

Neuro2A cells were used for expression of sodium channels and FHF2As by Lipofectamine (LFN2000)-mediated plasmid transfection at a 2:1 ratio of Nav- and FHF2A-expressing plasmids. For protein expression analysis, transfected cells were lysed after 24 hour culture. For electrophysiology, transfected cells were trypsinized, plated onto coverslips, and maintained for 24–48 hours before transfer to the recording chamber.

For analysis of Nav1.6<sup>TTXr</sup>-mediated inward sodium currents, O<sub>2</sub>:CO<sub>2</sub> (95:5; carbogen)-bubbled extracellular solution contained the following (in mM): 109 NaCl, 26 NaHCO<sub>3</sub>, 10 HEPES, 4.7 KCl, 11 glucose, 1.2 MgCl<sub>2</sub>, 2 CaCl<sub>2</sub>, 0.2 CdCl<sub>2</sub>, 3 myo-inositol, 2 Na pyruvate, 0.001 TTX (buffered to pH 7.2 with NaOH), and the intracellular pipette solution (Pipette Solution I) contained 104 CsF, 50 tetraethylamine chloride (TEA), 10 HEPES, 5 glucose, 2 MgCl<sub>2</sub>, 10 EGTA, and 2 Na<sub>2</sub>ATP, 0.2 Mg-GTP (buffered to pH 7.2 with CsOH). The recording chamber was set within a Nikon EF600 microscope equipped with 40X water-immersion objective and video camera. Transfected cells were identified by green fluorescence and whole-cell configuration was induced after achieving a 5–20 Gohm seal. Wide pipette tips were used yielding a series resistance of 2.5–5 Mohm following whole cell access. Voltage-clamp was conducted using an Axopatch 200B amplifier, Digidata 1322 digital/analog interface, and pCLAMP9 software (Molecular Devices). Recording signals were filtered at 5 kHz and digitized at 20 kHz. For measurements of evoked sodium currents, capacitive and leak currents were

subtracted during data acquisition using the presweep hyperpolarizing P/N method in the pCLAMP9 software.

Protocols for measuring voltage dependence of sodium channel steady-state inactivation and accumulation into and recovery from long-term inactivation were described previously.<sup>1</sup> To assay steady state inactivation, cells were depolarized for each sweep from -110 mV holding potential to test potentials between -110 mV to -20 mV in 5 mV intervals for 80 ms after which sodium current from non-inactivated channels was induced by further depolarization to -10 mV. To assay accumulating long-term inactivation, cells were subjected to four consecutive depolarizations from -90 mV to 0 mV for 16 ms separated by 40 ms -90 mV recovery phases. Progressively decreasing sodium current in the second, third, and fourth depolarizations reflects long-term channel inactivation. To assay for recovery rate from long-term inactivation, cells were subjected to three successive depolarizations from -90 mV to 0 mV to accumulate long-term inactivation, and a fourth depolarization was given at time intervals ranging from 20 ms to 1 s. Recovery from intrinsic fast inactivation occurs within 20 ms, so fraction recovery from long-term inactivation at time  $t$  was calculated as  $\{I_{Na}(t) - I_{Na}(20)\} / \{I_{Na}(0) - I_{Na}(20)\}$ , where  $I_{Na}(0)$  is the sodium current generated from the first depolarization,  $I_{Na}(20)$  is the sodium current from the fourth depolarization following 20 ms recovery, and  $I_{Na}(t)$  is the sodium current from the fourth depolarization following recovery for time  $t$ . All data points in the graphs are expressed as mean  $\pm$  standard error of values from all ( $n$ ) recorded cells. Statistical significance of differences in data point values between pairs of transfected cells was assessed by Student T test.

For biochemical analyses, cells were lysed in buffer containing (in mM) 137 NaCl, 20 Tris pH 7.4, 2 EDTA, 25  $\beta$ -glycerophosphate, 2  $Na_4P_2O_7$ , 1  $Na_3VO_4$ , 10% glycerol, 1% Triton X-100 and then clarified by high-speed centrifugation. Lysates were electrophoresed through 4%-20% polyacrylamide SDS gels directly or after immunoprecipitation with rabbit polyclonal antibodies against the C-terminal domain of FHF2.<sup>1</sup> Proteins were electrophoretically transferred from gel to polyvinylidene difluoride (PVDF) membrane and probed with either the same FHF2 antibodies or with pan-sodium channel monoclonal antibody K58/35 (Sigma Aldrich) followed

by incubation with secondary peroxidase conjugated antibodies and enhanced chemical luminescence detection

### X-chromosome inactivation analysis

Two assays comprising amplification of a short fragment of X chromosome (amplimer) were used to determine the activation status of each X chromosome. Each amplimer contains a polymorphic marker adjacent to the promoter of a gene which is unmethylated on the active X chromosome and methylated on the inactive chromosome. The two genes investigated were the androgen receptor *AR* and *ZNF261* (*ZMYM3*; *DXS6673E*). Both genes are in Xq13. Prior to amplification, both assays employ methylation-sensitive restriction enzymes, *HpaII* and *CfoI*, which cut at the promoter site on the active (unmethylated) but not on the inactive (methylated) X chromosome, using previously described methods.<sup>3,4</sup> To calculate the X-inactivation ratio, each sample was set up in duplicate: one digest and one mock digest without enzyme. Both were then amplified by PCR using a fluorescently labelled primer. The ratios of the heights of the two peaks were then compared between the undigested and digested samples. To evaluate the significance of patterns of X inactivation the ratios are compared with data from a sample of >1,000 phenotypically unaffected females.<sup>5</sup>

## References for Supplemental Material and Methods

1. Dover, K., Solinas, S., D'Angelo, E., and Goldfarb, M. (2010). Long-term inactivation particle for voltage-gated sodium channels. *J. Physiol. (Lond.)* 588, 3695–3711.
2. Venkatesan, K., Liu, Y., and Goldfarb, M. (2014). Fast-onset long-term open-state block of sodium channels by A-type FHF<sub>s</sub> mediates classical spike accommodation in hippocampal pyramidal neurons. *J. Neurosci.* 34, 16126–16139.
3. Sharp, A., Robinson, D., and Jacobs, P. (2000). Age- and tissue-specific variation of X chromosome inactivation ratios in normal women. *Human Genetics* 107, 343–349.
4. Beever, C., Lai, B.P.Y., Baldry, S.E.L., Peñaherrera, M.S., Jiang, R., Robinson, W.P., and Brown, C.J. (2003). Methylation of *ZNF261* as an assay for determining X chromosome inactivation patterns: *ZNF261* Assay for X Inactivation Patterns. *Am. J. Med. Genet. 120A*, 439–441.
5. Amos-Landgraf, J.M., Cottle, A., Plenge, R.M., Friez, M., Schwartz, C.E., Longshore, J., and Willard, H.F. (2006). X Chromosome–Inactivation Patterns of 1,005 Phenotypically Unaffected Females. *The American Journal of Human Genetics* 79, 493–499.
